# Supplementary material for: Quantitative kinetics reveal that reactions of HO2 are a significant sink for aldehydes in the atmosphere and may initiate the formation of highly oxygenated molecules via autoxidation
Source: Royal Society of Chemistry journal article supplement (doi:10.1039/d4cp00693c), 2024-01-01
Supplement: d4cp00693c1.pdf [file d4cp00693c1.pdf]

---

SUPPORTING INFORMATION

**Quantitative Kinetics Reveal that Reactions of HO<sub>2</sub> are a Significant Sink for Aldehydes in the Atmosphere and may Initiate the Formation of Highly Oxygenated Molecules via Autoxidation**

Qiao Gao<sup>a</sup>, Chuanyang Shen<sup>b</sup>, Haofei Zhang<sup>\*b</sup>, Bo Long<sup>\*a,c</sup> Donald G. Truhlar<sup>d\*</sup>

<sup>a</sup>School of Physics and Mechatronic Engineering, Guizhou Minzu University, Guiyang 550025, China

<sup>b</sup>Department of Chemistry, University of California, Riverside, California, 92507, USA

<sup>c</sup>College of Materials Science and Engineering, Guizhou Minzu university, Guiyang 550025, China

<sup>d</sup>Department of Chemistry, Boston College, Chestnut Hill, Massachusetts 02467, United States

<sup>d</sup>Department of Chemistry, Chemical Theory Center, and Minnesota Supercomputing Institute, University of Minnesota, Minneapolis, Minnesota 55455-0431, USA

\*Corresponding author emails:

[wwwltcommon@sina.com](mailto:wwwltcommon@sina.com) (Bo Long)

[haofei.zhang@ucr.edu](mailto:haofei.zhang@ucr.edu) (Haofei Zhang)

[truhlar@umn.edu](mailto:truhlar@umn.edu) (Donald G. Truhlar)

## TABLE OF CONTENTS

|                                                                                                                                                                                                                                                                                                                                                                             |      |
|-----------------------------------------------------------------------------------------------------------------------------------------------------------------------------------------------------------------------------------------------------------------------------------------------------------------------------------------------------------------------------|------|
| Section S1. Computational details of high-pressure-limit rate coefficients                                                                                                                                                                                                                                                                                                  | S-5  |
| Section S2. Computational details of pressure-dependent rate coefficients                                                                                                                                                                                                                                                                                                   | S-6  |
| Table S1. Electronic structure methods and basis sets                                                                                                                                                                                                                                                                                                                       | S-7  |
| Table S2. Standard scale factors applied to vibrational frequencies                                                                                                                                                                                                                                                                                                         | S-8  |
| Table S3. Specific reaction scale factors calculated by using the MPW1K/MG3S method for<br>$\text{HO}_2 + \text{C}_5\text{H}_{11}\text{CHO}/\text{C}_4\text{H}_9\text{CHO}/\text{C}_3\text{H}_7\text{CHO}$ and H-shift reactions                                                                                                                                            | S-8  |
| Table S4. Numbers of distinguishable structures and torsions                                                                                                                                                                                                                                                                                                                | S-9  |
| Table S5. Lennard-Jones parameters for the calculations of collision rates                                                                                                                                                                                                                                                                                                  | S-12 |
| Table S6. Mean unsigned deviations for the classical barrier heights and enthalpies of<br>activation at 0 K (kcal/mol) for the $\text{HO}_2$ reactions with $\text{C}_5\text{H}_{11}\text{CHO}$ , $\text{C}_4\text{H}_9\text{CHO}$ ,<br>and $\text{C}_3\text{H}_7\text{CHO}$ as calculated using various theoretical methods with the standard<br>vibrational scale factors | S-13 |
| Table S7. Mean unsigned deviations for the relative enthalpies at 0 K (in kcal/mol) for the<br>H-shift reactions as calculated using various theoretical methods with the standard<br>vibrational scale factors                                                                                                                                                             | S-14 |
| Table S8. The tunneling and recrossing transmission coefficients, the torsional anharmonic<br>factors, the HPL rate coefficients ( $\text{cm}^3 \text{ molecule}^{-1} \text{ s}^{-1}$ ), and activation energies<br>(kcal/mol) for the $\text{HO}_2 + \text{C}_5\text{H}_{11}\text{CHO}$ (R1) reaction                                                                      | S-15 |
| Table S9. The tunneling and recrossing transmission coefficients, the torsional anharmonic<br>factors, the HPL rate coefficients ( $\text{cm}^3 \text{ molecule}^{-1} \text{ s}^{-1}$ ), and activation energies<br>(kcal/mol) for the $\text{HO}_2 + \text{C}_4\text{H}_9\text{CHO}$ (R2) reaction                                                                         | S-16 |
| Table S10. The tunneling and recrossing transmission coefficients, the torsional anharmonic<br>factors, the HPL rate coefficients ( $\text{cm}^3 \text{ molecule}^{-1} \text{ s}^{-1}$ ), and activation energies<br>(kcal/mol) for the $\text{HO}_2 + \text{C}_3\text{H}_7\text{CHO}$ (R3) reaction                                                                        | S-17 |
| Table S11. The tunneling and recrossing transmission coefficients, the torsional anharmonic<br>factors, HPL rate coefficients ( $\text{s}^{-1}$ ), and activation energies (kcal/mol) for the M1A<br>isomerism (R4) reaction                                                                                                                                                | S-18 |
| Table S12. The tunneling and recrossing transmission coefficients, the torsional anharmonic<br>factors, HPL rate coefficients ( $\text{s}^{-1}$ ), and activation energies (kcal/mol) for the M1B<br>isomerism (R5) reaction                                                                                                                                                | S-19 |
| Table S13. The tunneling and recrossing transmission coefficients, the torsional anharmonic<br>factors, HPL rate coefficients ( $\text{s}^{-1}$ ), and activation energies (kcal/mol) for the M1C<br>isomerism (R6) reaction                                                                                                                                                | S-20 |
| Table S14. Fitting parameters for the high-pressure limit rate coefficients                                                                                                                                                                                                                                                                                                 | S-21 |

---

|                                                                                                                                                                                                                                                                                                                      |      |
|----------------------------------------------------------------------------------------------------------------------------------------------------------------------------------------------------------------------------------------------------------------------------------------------------------------------|------|
| Table S15. The conventional transition state theory (TST) rate coefficients ( $\text{cm}^3 \text{ molecule}^{-1} \text{ s}^{-1}$ ) without a transmission coefficient for the $\text{HO}_2 + \text{RCHO}$ ( $\text{X} = \text{C}_5\text{H}_{11}$ , $\text{C}_4\text{H}_9$ , and $\text{C}_3\text{H}_7$ ) reactions   | S-21 |
| Table S16. The conventional transition state theory (TST) rate coefficients ( $\text{s}^{-1}$ ) without a transmission coefficient for the H-shift reactions                                                                                                                                                         | S-22 |
| Table S17. The falloff factor calculated by the SS-QRRK method and the ME/RRKM method for the $\text{HO}_2 + \text{C}_5\text{H}_{11}\text{CHO}/\text{C}_4\text{H}_9\text{CHO}/\text{C}_3\text{H}_7\text{CHO}$ reactions as functions of temperature at 1bar                                                          | S-23 |
| Table S18A. Temperature–pressure dependent rate coefficient $k(T,P)$ ( $\text{cm}^3 \text{ molecule}^{-1} \text{ s}^{-1}$ ) of $\text{HO}_2 + \text{C}_5\text{H}_{11}\text{CHO}$ (R1) reaction as calculated by dual-level DL-MS-CVT/SCT /SS-QRRK                                                                    | S-24 |
| Table S18B. Temperature–pressure dependent rate coefficient $k(T,P)$ ( $\text{cm}^3 \text{ molecule}^{-1} \text{ s}^{-1}$ ) of $\text{HO}_2 + \text{C}_5\text{H}_{11}\text{CHO}$ (R1) reaction as calculated by the ME/RRKM method with the higher level of electronic structure (CCSD(T)-F12a/cc-PVTZ//M06-2X/MG3S) | S-25 |
| Table S19A. Temperature–pressure dependent rate coefficient $k(T,P)$ ( $\text{cm}^3 \text{ molecule}^{-1} \text{ s}^{-1}$ ) of $\text{HO}_2 + \text{C}_4\text{H}_9\text{CHO}$ (R2) reaction as calculated by dual-level DL-MS-CVT/SCT /SS-QRRK                                                                       | S-26 |
| Table S19B. Temperature–pressure dependent rate coefficient $k(T,P)$ ( $\text{cm}^3 \text{ molecule}^{-1} \text{ s}^{-1}$ ) of $\text{HO}_2 + \text{C}_4\text{H}_9\text{CHO}$ (R2) reaction as calculated by the ME/RRKM with the higher level of electronic structure (CCSD(T)-F12a/cc-PVTZ//M06-2X/MG3S)           | S-27 |
| Table S20A. Temperature–pressure dependent rate coefficient $k(T,P)$ ( $\text{cm}^3 \text{ molecule}^{-1} \text{ s}^{-1}$ ) of $\text{HO}_2 + \text{C}_3\text{H}_7\text{CHO}$ (R3) reaction as calculated by dual-level DL-MS-CVT/SCT /SS-QRRK                                                                       | S-28 |
| Table S20B. Temperature–pressure dependent rate coefficient $k(T,P)$ ( $\text{cm}^3 \text{ molecule}^{-1} \text{ s}^{-1}$ ) of $\text{HO}_2 + \text{C}_3\text{H}_7\text{CHO}$ (R3) reaction as calculated by the ME/RRKM with the higher level of electronic structure (CCSD(T)-F12a/cc-pVTZ-F12//M06-2X/MG3S)       | S-29 |
| Table S21. $\text{NO}_3$ concentrations ( $\text{molecules cm}^{-3}$ ), the rate coefficients ( $\text{cm}^3 \text{ molecule}^{-1} \text{ s}^{-1}$ ), and the atmospheric lifetimes (s) with respect to bimolecular reaction as functions of altitude                                                                | S-30 |
| Table S22. Volatility estimation of the products from hexanal oxidation                                                                                                                                                                                                                                              | S-31 |
| Table S23. Cartesian coordinates ( $\text{\AA}$ ) of the optimized geometries                                                                                                                                                                                                                                        | S-32 |
| Table S24. Absolute energies in hartrees                                                                                                                                                                                                                                                                             | S-40 |

---

|                                                                                                                                                                                                                                                                                                                                                                                            |      |
|--------------------------------------------------------------------------------------------------------------------------------------------------------------------------------------------------------------------------------------------------------------------------------------------------------------------------------------------------------------------------------------------|------|
| Figure S1. Exemplified mass spectrum of (A) hexanal + HO <sub>2</sub> and (B) pentanal + HO <sub>2</sub> gas-phase products. In the insert of (A), mass spectrum is from ozonolysis of a-pinene + hexanal + methanol, where C <sub>6</sub> H <sub>14</sub> O <sub>3</sub> was present only with hexanal, but not with a-pinene only, indicative of the hexanal + HO <sub>2</sub> chemistry | S-43 |
| Figure S2. The relative enthalpies of all the H-shift reactions of the adduct M1A (C <sub>6</sub> H <sub>13</sub> O <sub>5</sub> ) at the CCSD(T)-F2a/cc-pVDZ-F12//M06-2X/MG3S level with the standard scale factor at 0 K                                                                                                                                                                 | S-44 |
| Figure S3. The relative enthalpies of all the H-shift reactions of the adduct M1B (C <sub>5</sub> H <sub>11</sub> O <sub>5</sub> ) at the CCSD(T)-F2a/cc-pVDZ-F12//M06-2X/MG3S level with the standard scale factor at 0 K                                                                                                                                                                 | S-45 |
| Figure S4. The relative enthalpies of all the H-shift reactions of the adduct M1C (C <sub>4</sub> H <sub>9</sub> O <sub>5</sub> ) at the CCSD(T)-F2a/cc-pVDZ-F12//M06-2X/MG3S level with the standard scale factor at 0 K                                                                                                                                                                  | S-46 |
| Figure S5. The relative enthalpies of all the H-shift reactions of the adduct C <sub>3</sub> A (C <sub>6</sub> H <sub>13</sub> O <sub>5</sub> ) at the CCSD(T)-F2a/cc-pVDZ-F12//M06-2X/MG3S level with the standard scale factor at 0 K                                                                                                                                                    | S-47 |
| Figure S6. The relative enthalpies of all the H-shift reactions of the adduct M3A (C <sub>6</sub> H <sub>13</sub> O <sub>5</sub> ) at the CCSD(T)-F2a/cc-pVDZ-F12//M06-2X/MG3S level with the standard scale factor at 0 K                                                                                                                                                                 | S-48 |
| Figure S7. The relative enthalpies of all the H-shift reactions of the adduct C5A (C <sub>6</sub> H <sub>13</sub> O <sub>7</sub> ) at the CCSD(T)-F2a/cc-pVDZ-F12//M06-2X/MG3S level with the standard scale factor at 0 K                                                                                                                                                                 | S-49 |
| Input file for MESS for the bimolecular reaction of HO <sub>2</sub> + C <sub>5</sub> H <sub>11</sub> CHO                                                                                                                                                                                                                                                                                   | S-50 |
| Input file for MESS for the bimolecular reaction of HO <sub>2</sub> + C <sub>4</sub> H <sub>9</sub> CHO                                                                                                                                                                                                                                                                                    | S-56 |
| Input file for MESS for the bimolecular reaction of HO <sub>2</sub> + C <sub>3</sub> H <sub>7</sub> CHO                                                                                                                                                                                                                                                                                    | S-61 |
| References of the ESI                                                                                                                                                                                                                                                                                                                                                                      | S-66 |

## S1. Computational details of high-pressure-limit rate coefficients

Reactions R1–R3 are pressure dependent, and the first step in calculating their rate constants is to calculate their high-pressure-limit (HPL) rate constants. The single-state calculations of reaction rates for R1, R2, and R3 are mainly based on passage through transition states TS1A, TS1B, and TS1C, respectively. These are the lowest-energy transition structures for these reactions. Passage through higher-energy conformers of the transition states is accounted for in the multistructural torsional anharmonicity factor. We use a dual-level strategy in which the lower level (LL) is M11-L/MG3S, and the higher level (HL) is CCSD(T)-F12a/cc-pVTZ-F12/M06-2X/MG3S.

The HPL rate coefficients were calculated by the following formula:

$$k_{MS-CVT/SCT}^{DL} = F_{fwd}^{MS-T} \kappa_{SS-SCT}^{LL} \Gamma_{SS-CVT}^{LL} k_{SS-TST}^{HL} \quad (S1)$$

where all quantities in this expression are functions of temperature,  $k_{MS-CVT/SCT}^{DL}(T)$  is the rate coefficient of dual-level multistructural canonical variational transition state theory with small-curvature tunneling for the reaction from the conformational ensemble of bimolecular reagents to the conformational ensemble of transition states for this reaction,  $F_{fwd}^{MS-T}$  is the multistructural torsional anharmonicity factor, which includes the contributions from all the conformational structures of the reactants and the transition states,  $\kappa_{SS-SCT}^{LL}$  is the tunneling coefficient calculated by using ground-state small-curvature tunneling for the lowest-energy transition state from the pre-reactive complex to the corresponding adduct,  $\Gamma_{SS-CVT,TS1B}^{LL}$  is the recrossing effect and is equal to  $\kappa_{SS-CVT}^{LL}/\kappa_{SS-TST}^{LL}$  obtained by using single-structure canonical variational transition state theory without tunneling for the lowest-energy conformers, and  $k_{SS-TST}^{HL}$  is the single-structure conventional transition state theory rate coefficient without tunneling for the lowest-energy conformers.

The HPL rate constants for reactions R4, R5, and R6 (the 1,7-H-shift reactions) are mainly based on passage through transition states TS2A, TS2B, and TS2C, respectively. These are the lowest-energy transition structure for these reactions. Passage through higher-energy conformers of the transition states is accounted for in the multistructural torsional anharmonicity factor. We again use a dual-level strategy in which the lower level (LL) is MN15-L/MG3S for R4-R6, and the higher level (HL) is CCSD(T)-F12a/cc-pVTZ-F12/M06-2X/MG3S. The HPL rate constants are again calculated by eq S1.

## S2. Computational details of pressure-dependent rate coefficients

The pressure-dependent rate coefficients of the bimolecular reactions were computed in two ways – by the SS-QRRK<sup>1,2,1</sup> method and by the master equation (ME/RRKM)<sup>2-3</sup> method.

For the SS-QRRK calculations,  $F_E$  is computed based on the numerically integrated Whitten-Rabinovitch approximation.<sup>4</sup> The collision efficiency is computed based on the exponential-down model<sup>5</sup> (also called the Gilbert-Luther-Troe model<sup>6</sup>) with the energy-transfer-down parameter equal to 300 cm<sup>-1</sup>. This model also requires Lennard-Jones (L-J) parameters, and the values we used are given in Table S4.

RRKM calculations require microcanonical rate coefficients, and these were obtained by Rice-Ramsperger-Kassel-Marcus (RRKM) theory<sup>7</sup> with parameters obtained by CCSD(T)-F12a/cc-pVTZ-F12//M062X/MG3S for the HO<sub>2</sub> + C<sub>5</sub>H<sub>11</sub>CHO/ C<sub>4</sub>H<sub>9</sub>CHO/ C<sub>3</sub>H<sub>7</sub>CHO reactions.

**Table S1.** Electronic structure methods and basis sets

| Abbreviation            | Explanation                                                                                                                 | Reference |
|-------------------------|-----------------------------------------------------------------------------------------------------------------------------|-----------|
| CCSD(T)                 | Coupled cluster theory with single and double excitations and quasiperturbative connected triples                           | 8         |
| CCSD(T)-F12a            | CCSD(T) with explicit correlation of type F12a                                                                              | 9,10      |
| M06-2X                  | M06-2X hybrid meta GGA density functional                                                                                   | 11        |
| M11-L                   | M11-L local meta generalized gradient approximation density functional                                                      | 12        |
| MN15-L                  | MN15-L local meta nonseparable gradient approximation density functional                                                    | 13        |
| A/B <sup>a</sup>        | A calculation with electronic structure approximation A and basis set B                                                     |           |
|                         |                                                                                                                             |           |
| A/B//C/D <sup>b,c</sup> | A single-point energy calculation with method A/B at a geometry optimized by method C/D and with frequencies by method C/D. |           |
| cc-pVTZ-F12             | A polarized valence-triple-zeta basis set for explicitly correlated calculations                                            | 14        |
| cc-pVDZ-F12             | A polarized valence-double-zeta basis set for explicitly correlated calculations                                            | 15        |
| MG3S                    | A minimally augmented polarized valence-triple-zeta basis set                                                               | 16        |
| A/B//C/D <sup>b,c</sup> | A single-point energy calculation with method A/B at a geometry optimized by method C/D and with frequencies by method C/D. |           |
|                         |                                                                                                                             |           |
| CC/TZ-F12//             | abbreviation used in this article for CCSD(T)-F2a/cc-pVTZ-F12//M06-2X/MG3S                                                  |           |
| CC/DZ-F12//             | abbreviation used in this article for CCSD(T)-F2a/cc-pVDZ-F12//M06-2X/MG3S                                                  |           |

Table S2. Standard scale factors applied to vibrational frequencies<sup>a</sup>

| Methods     | Scale Factor |
|-------------|--------------|
| M06-2X/MG3S | 0.970        |
| M11-L /MG3S | 0.985        |
| MN15-L/MG3S | 0.977        |

<sup>a</sup> The scale factors are calculated by the method in Alecu, I. M.; Zheng, J.; Zhao, Y.; Truhlar, D. G., Computational Thermochemistry: Scale Factor Databases and Scale Factors for Vibrational Frequencies Obtained from Electronic Model Chemistries. *J. Chem. Theory Comput.* 2010, 6, 2872-2887.

Table S3. Specific-reaction-parameter scale factors calculated by using the MPW1K/MG3S method for the HO<sub>2</sub> + C<sub>5</sub>H<sub>11</sub>CHO, HO<sub>2</sub> + C<sub>4</sub>H<sub>9</sub>CHO, HO<sub>2</sub> + C<sub>3</sub>H<sub>7</sub>CHO, and H-shift reactions<sup>a,b</sup>

|                 |                                  |                                  |                                 |                 |       |       |                     |
|-----------------|----------------------------------|----------------------------------|---------------------------------|-----------------|-------|-------|---------------------|
|                 | C <sub>6</sub> H <sub>12</sub> O | C <sub>5</sub> H <sub>10</sub> O | C <sub>4</sub> H <sub>8</sub> O | HO <sub>2</sub> | TS1A  | TS1B  | TS1C                |
| $\lambda^{Anh}$ | 0.987 <sup>c</sup>               | 0.987 <sup>c</sup>               | 0.987 <sup>c</sup>              | 0.985           | 0.984 | 0.983 | 0.982               |
| $\lambda^{ZPE}$ | 0.970 <sup>c</sup>               | 0.970 <sup>c</sup>               | 0.970 <sup>c</sup>              | 0.967           | 0.967 | 0.966 | 0.965               |
|                 | M1A                              | M1B                              | M1C                             | TS2A            | TS2B  | TS2C  | C1A,<br>C1B,<br>C1C |
| $\lambda^{Anh}$ | 0.986 <sup>c</sup>               | 0.987 <sup>c</sup>               | 0.987 <sup>c</sup>              | 0.986           | 0.985 | 0.985 | 0.986 <sup>c</sup>  |
| $\lambda^{ZPE}$ | 0.970 <sup>c</sup>               | 0.970 <sup>c</sup>               | 0.970 <sup>c</sup>              | 0.968           | 0.967 | 0.967 | 0.970 <sup>c</sup>  |

<sup>a</sup> $\lambda^{Anh}$  equals the ratio of anharmonic zero-point vibrational energy to harmonic zero-point vibrational energy of the MPW1K/MG3S method.

<sup>b</sup> $\lambda^{ZPE}$  equals the product of  $\lambda^{Anh}$  and the generic parameter  $\lambda^H$ , where  $\lambda^H$  is obtained from previous studies that gave  $\lambda^H$  equal to 0.982 for M06-2X/MG3S.

<sup>c</sup>For the aldehydes, the adducts, and the products of the H-shift reactions, we use the standard scale factors.



**Table S4.** Numbers of distinguishable structures and torsions

|                |  | distinguishable structures | torsions                                                      |
|----------------|--|----------------------------|---------------------------------------------------------------|
| $C_5H_{11}CHO$ |  | 27                         | 2-1-5-8<br>1-5-8-11<br>5-8-11-14<br>8-11-14-17<br>11-14-17-19 |
| $C_4H_9CHO$    |  | 9                          | 14-13-1-4<br>13-1-4-7<br>1-4-7-10<br>4-7-10-12                |
| $C_3H_7CHO$    |  | 3                          | 11-10-1-4<br>10-1-4-7<br>1-4-7-9                              |
| TS1A           |  | 33                         | 2-1-5-8<br>1-5-8-11<br>5-8-11-14<br>8-11-14-17<br>11-14-17-18 |

|      |                                                                                      |     |                                                                                             |
|------|--------------------------------------------------------------------------------------|-----|---------------------------------------------------------------------------------------------|
| TS1B | 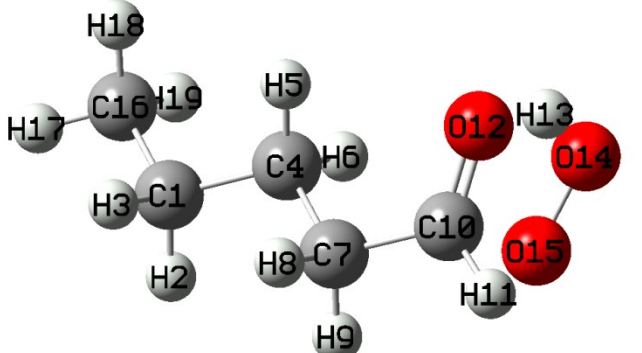   | 16  | 17-16-1-4<br>16-1-4-7<br>1-4-7-10<br>4-7-10-11                                              |
| TS1C |    | 9   | 15-13-1-4<br>13-1-4-7<br>1-4-7-8                                                            |
| M1A  |   | 256 | 2-1-5-8<br>1-5-8-11<br>5-8-11-14<br>8-11-14-17<br>11-14-17-21<br>14-17-21-22<br>18-17-19-20 |
| M1B  |  | 30  | 17-16-1-4<br>16-1-4-7<br>1-4-7-10<br>4-7-10-14<br>7-10-14-15<br>11-10-12-13                 |

|      |                                                                                     |    |                                                            |
|------|-------------------------------------------------------------------------------------|----|------------------------------------------------------------|
| M1C  | 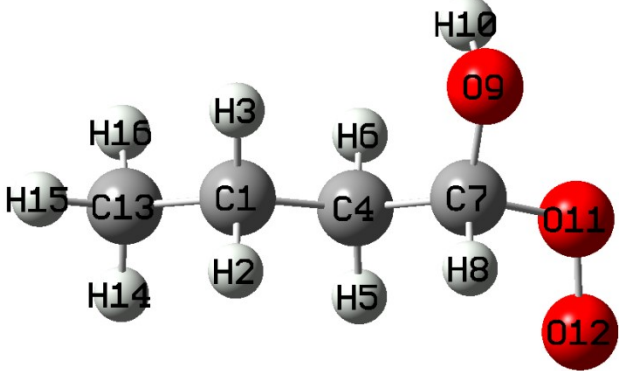   | 31 | 15-13-1-4<br>13-1-4-7<br>1-4-7-11<br>4-7-11-12<br>8-7-9-10 |
| TS2A |   | 2  | 2-1-5-8<br>14-17-19-20                                     |
| TS2B |  | 2  | 13-12-9-6<br>1-17-15-16                                    |
| TS2C |  | 2  | 14-13-7-2<br>2-1-10-11                                     |

**Table S5.** Lennard-Jones parameters for calculations of collision rates used in the pressure-dependent calculations

| Molecule                         | $\epsilon$ (in K) | $\sigma$ (in Å) | Reference |
|----------------------------------|-------------------|-----------------|-----------|
| N <sub>2</sub>                   | 82                | 3.74            | 17        |
| He                               | 10                | 2.55            | 23        |
| HO <sub>2</sub>                  | 289.3             | 4.20            | 18        |
| C <sub>4</sub> H <sub>8</sub> O  | 148.02            | 4.35            | 19        |
| C <sub>5</sub> H <sub>10</sub> O | 171.37            | 4.34            | 25        |
| C <sub>6</sub> H <sub>12</sub> O | 178.29            | 4.70            | 25        |

**Table S6.** Barrier heights, enthalpies of activation at 0 K (in kcal/mol), and their mean unsigned deviations from the reference values for the HO<sub>2</sub> reactions with C<sub>5</sub>H<sub>11</sub>CHO, C<sub>4</sub>H<sub>9</sub>CHO, and C<sub>3</sub>H<sub>7</sub>CHO (reactions R1–R2) as calculated using various theoretical methods with the standard vibrational scale factors

| Method                                | TS1A <sup>a</sup>   |                       |                   |
|---------------------------------------|---------------------|-----------------------|-------------------|
|                                       | $\Delta V^\ddagger$ | $\Delta H_0^\ddagger$ | MUD <sup>b</sup>  |
| CCSD(T)-F12a/cc-pVTZ-F12//M06-2X/MG3S | -2.28               | -1.67                 | 0.00 <sup>c</sup> |
| CCSD(T)-F12a/cc-pVDZ-F12//M06-2X/MG3S | -2.21               | -1.60                 | 0.07              |
| M11-L /MG3S                           | -1.38               | -1.11                 | 0.73              |
| M06-2X/MG3S                           | -3.92               | -3.31                 | 1.64              |
| Method                                | TS1B <sup>d</sup>   |                       |                   |
|                                       | $\Delta V^\ddagger$ | $\Delta H_0^\ddagger$ | MUD <sup>b</sup>  |
| CCSD(T)-F12a/cc-pVTZ-F12//M06-2X/MG3S | -2.29               | -1.68                 | 0.00 <sup>c</sup> |
| CCSD(T)-F12a/cc-pVDZ-F12//M06-2X/MG3S | -2.22               | -1.61                 | 0.07              |
| M11-L/MG3S                            | -1.35               | -1.04                 | 0.79              |
| M06-2X/MG3S                           | -3.90               | -3.29                 | 1.61              |
| Method                                | TS1C <sup>e</sup>   |                       |                   |
|                                       | $\Delta V^\ddagger$ | $\Delta H_0^\ddagger$ | MUD <sup>b</sup>  |
| CCSD(T)-F12a/cc-pVTZ-F12//M06-2X/MG3S | -2.33               | -1.69                 | 0.00 <sup>c</sup> |
| CCSD(T)-F12a/cc-pVDZ-F12//M06-2X/MG3S | -2.56               | -1.61                 | 0.07              |
| M11-L/MG3S                            | -1.38               | -1.04                 | 0.80              |
| M06-2X/MG3S                           | -3.94               | -3.29                 | 1.60              |

<sup>a</sup>TS1A is the lowest-energy transition structure of the HO<sub>2</sub> + C<sub>5</sub>H<sub>11</sub>CHO reaction (R1).

<sup>b</sup>MUD is mean unsigned deviation with respect to the first row. The mean unsigned deviation (MUD) is the average of the absolute error of the values in the previous two columns.

<sup>c</sup>These values are zero by definition since this is the reference value.

<sup>d</sup>TS1B is the lowest-energy transition structure of the HO<sub>2</sub> + C<sub>4</sub>H<sub>9</sub>CHO reaction (R2).

<sup>e</sup>TS1C is the lowest-energy transition structure of the HO<sub>2</sub> + C<sub>3</sub>H<sub>7</sub>CHO reaction (R3).

**Table S7.** The relative enthalpies at 0 K (in kcal/mol), and their mean unsigned deviations from the reference values for the H-shift reactions (reactions R4–R6) as calculated using various theoretical methods with the standard vibrational scale factors

| Method                                | $\Delta H_0$      |      |                  |
|---------------------------------------|-------------------|------|------------------|
|                                       | TS2A <sup>a</sup> | M2A  | MUD <sup>b</sup> |
| CCSD(T)-F12a/cc-pVTZ-F12//M06-2X/MG3S | 17.13             | 9.05 | 0.00             |
| CCSD(T)-F12a/cc-pVDZ-F12//M06-2X/MG3S | 17.91             | 9.83 | 0.78             |
| MN15-L/MG3S                           | 15.62             | 8.58 | 0.99             |
| M11-L/MG3S                            | 14.78             | 6.65 | 2.37             |

  

| Method                                | $\Delta H_0$      |      |                  |
|---------------------------------------|-------------------|------|------------------|
|                                       | TS2B <sup>c</sup> | M2B  | MUD <sup>b</sup> |
| CCSD(T)-F12a/cc-pVTZ-F12//M06-2X/MG3S | 19.26             | 9.14 | 0.00             |
| CCSD(T)-F12a/cc-pVDZ-F12//M06-2X/MG3S | 19.43             | 9.31 | 0.17             |
| MN15-L/MG3S                           | 16.87             | 7.59 | 1.97             |
| M11-L/MG3S                            | 16.14             | 6.21 | 3.02             |

  

| Method                                | $\Delta H_0$      |      |                  |
|---------------------------------------|-------------------|------|------------------|
|                                       | TS2C <sup>d</sup> | M2C  | MUD <sup>b</sup> |
| CCSD(T)-F12a/cc-pVTZ-F12//M06-2X/MG3S | 21.45             | 9.47 | 0.00             |
| CCSD(T)-F12a/cc-pVDZ-F12//M06-2X/MG3S | 21.63             | 9.65 | 0.18             |
| MN15-L/MG3S                           | 19.42             | 7.35 | 2.07             |
| M11-L/MG3S                            | 18.16             | 6.76 | 3.00             |

<sup>a</sup>TS2A is the lowest-energy transition structure of 1, 7-H-shift reaction (R4) of M1A.

<sup>b</sup>MUD is mean unsigned deviation with respect to the first row. The mean unsigned deviation (MUD) is the average of the absolute error of the values in the previous two columns.

<sup>c</sup>TS2B is the lowest-energy transition structure for the 1, 6-H-shift reaction (R5) of M1B.

<sup>d</sup>TS2C is the lowest-energy transition structure for the 1, 5-H-shift reaction (R6) of M1C.

**Table S8.** Tunneling and recrossing transmission coefficients, torsional anharmonic factors, high-pressure-limit (HPL) rate coefficients ( $\text{cm}^3 \text{ molecule}^{-1} \text{ s}^{-1}$ ), and HPL activation energies (kcal/mol) for the  $\text{HO}_2 + \text{C}_5\text{H}_{11}\text{CHO}$  reaction (reaction R1 with lowest-energy transition structure TS1A and other conformers included by the multistructural torsional anharmonicity factor)

| $T(K)$ | $F_{fwd}^{MS-T}{}^a$ | $k_{SS-TST}^{HL}{}^b$ | $\Gamma_{SS-CVT}^{LL}{}^c$ | $k_{SS-SCT}^{LL}{}^d$ | $k_{R1}{}^e$ | $E_{af}{}^f$ |
|--------|----------------------|-----------------------|----------------------------|-----------------------|--------------|--------------|
| 190    | 1.15                 | 3.16E-13              | 3.71E-01                   | 4.73                  | 6.40E-13     | -2.96        |
| 200    | 1.15                 | 2.36E-13              | 3.92E-01                   | 4.06                  | 4.33E-13     | -2.91        |
| 210    | 1.15                 | 1.82E-13              | 4.11E-01                   | 3.56                  | 3.07E-13     | -2.85        |
| 220    | 1.15                 | 1.43E-13              | 4.30E-01                   | 3.18                  | 2.26E-13     | -2.79        |
| 230    | 1.15                 | 1.15E-13              | 4.47E-01                   | 2.89                  | 1.72E-13     | -2.73        |
| 240    | 1.15                 | 9.49E-14              | 4.64E-01                   | 2.65                  | 1.34E-13     | -2.68        |
| 250    | 1.15                 | 7.93E-14              | 4.79E-01                   | 2.45                  | 1.08E-13     | -2.63        |
| 260    | 1.15                 | 6.73E-14              | 4.94E-01                   | 2.29                  | 8.80E-14     | -2.57        |
| 270    | 1.16                 | 5.78E-14              | 5.07E-01                   | 2.16                  | 7.33E-14     | -2.52        |
| 280    | 1.16                 | 5.03E-14              | 5.20E-01                   | 2.05                  | 6.20E-14     | -2.47        |
| 290    | 1.16                 | 4.43E-14              | 5.33E-01                   | 1.95                  | 5.33E-14     | -2.42        |
| 298    | 1.16                 | 4.02E-14              | 5.42E-01                   | 1.89                  | 4.75E-14     | -2.38        |
| 300    | 1.16                 | 3.93E-14              | 5.44E-01                   | 1.87                  | 4.63E-14     | -2.37        |
| 310    | 1.16                 | 3.53E-14              | 5.55E-01                   | 1.80                  | 4.08E-14     | -2.32        |
| 320    | 1.16                 | 3.19E-14              | 5.65E-01                   | 1.73                  | 3.62E-14     | -2.27        |
| 330    | 1.16                 | 2.90E-14              | 5.75E-01                   | 1.68                  | 3.25E-14     | -2.23        |
| 340    | 1.16                 | 2.66E-14              | 5.84E-01                   | 1.63                  | 2.94E-14     | -2.18        |
| 350    | 1.16                 | 2.45E-14              | 5.92E-01                   | 1.59                  | 2.68E-14     | -2.13        |

${}^a F_{fwd}^{MS-T}$  is the multistructural torsional anharmonicity factor calculated with the standard scale factor.

${}^b k_{SS-TST}^{HL}$  is the HL level calculation by conventional transition state theory without a transmission coefficient with the specific-reaction-parameter scale factor.

${}^c \Gamma_{SS-CVT}^{LL}$  is the LL recrossing transmission coefficient, which equals  $k_{SS-CVT}^{LL}/k_{SS-TST}^{LL}$  calculated with the standard scale factor.

${}^d k_{SS-SCT}^{LL}$  is the LL tunneling transmission coefficient calculated by the small-curvature tunneling approximation with the standard scale factor.

${}^e$ The high-pressure-limit rate coefficient given by eq S1. HL is CCSD(T)-F12a/cc-pVTZ//M06-2X/MG3S, and LL is M11-L/MG3S. This bimolecular reaction is considered to be independent of pressure, and so the high-pressure limit (HPL) applies at all pressures.

${}^f E_a$  is Arrhenius activation energy (kcal/mol) for the high-pressure limit, which is

$$\text{calculated as } -R \overline{d \ln k_{1b} / d(1/T)} .$$

**Table S9.** Tunneling and recrossing transmission coefficients, torsional anharmonic factors, high-pressure-limit (HPL) rate coefficients ( $\text{cm}^3 \text{ molecule}^{-1} \text{ s}^{-1}$ ), and HPL activation energies (kcal/mol) for the  $\text{HO}_2 + \text{C}_4\text{H}_9\text{CHO}$  reaction (reaction R2 with lowest-energy transition structure TS1B and other conformers included by the multistructural torsional anharmonicity factor)

| $T(\text{K})$ | $F_{fwd}^{MS-T}{}^a$ | $k_{SS-TST}^{HL}{}^b$ | $\Gamma_{SS-CVT}^{LL}{}^c$ | $k_{SS-SCT}^{LL}{}^d$ | $k_{R2}{}^e$ | $E_a{}^f$ |
|---------------|----------------------|-----------------------|----------------------------|-----------------------|--------------|-----------|
| 190           | 1.91                 | 3.75E-13              | 3.60E-01                   | 4.87                  | 1.26E-12     | -2.99     |
| 200           | 1.93                 | 2.78E-13              | 3.81E-01                   | 4.15                  | 8.48E-13     | -2.93     |
| 210           | 1.94                 | 2.12E-13              | 4.00E-01                   | 3.63                  | 5.99E-13     | -2.88     |
| 220           | 1.95                 | 1.66E-13              | 4.19E-01                   | 3.23                  | 4.39E-13     | -2.83     |
| 230           | 1.96                 | 1.33E-13              | 4.36E-01                   | 2.92                  | 3.33E-13     | -2.78     |
| 240           | 1.96                 | 1.09E-13              | 4.52E-01                   | 2.68                  | 2.59E-13     | -2.73     |
| 250           | 1.97                 | 9.05E-14              | 4.68E-01                   | 2.48                  | 2.07E-13     | -2.68     |
| 260           | 1.97                 | 7.64E-14              | 4.83E-01                   | 2.31                  | 1.68E-13     | -2.63     |
| 270           | 1.97                 | 6.54E-14              | 4.96E-01                   | 2.18                  | 1.40E-13     | -2.58     |
| 280           | 1.97                 | 5.67E-14              | 5.10E-01                   | 2.06                  | 1.18E-13     | -2.54     |
| 290           | 1.97                 | 4.97E-14              | 5.22E-01                   | 1.96                  | 1.00E-13     | -2.49     |
| 298           | 1.97                 | 4.50E-14              | 5.31E-01                   | 1.89                  | 8.93E-14     | -2.46     |
| 300           | 1.97                 | 4.40E-14              | 5.34E-01                   | 1.88                  | 8.70E-14     | -2.45     |
| 310           | 1.97                 | 3.93E-14              | 5.45E-01                   | 1.80                  | 7.61E-14     | -2.40     |
| 320           | 1.97                 | 3.54E-14              | 5.55E-01                   | 1.74                  | 6.73E-14     | -2.36     |
| 330           | 1.97                 | 3.22E-14              | 5.65E-01                   | 1.68                  | 6.01E-14     | -2.32     |
| 340           | 1.96                 | 2.94E-14              | 5.74E-01                   | 1.63                  | 5.41E-14     | -2.27     |
| 350           | 1.96                 | 2.71E-14              | 5.83E-01                   | 1.59                  | 4.91E-14     | -2.23     |

${}^a F_{fwd}^{MS-T}$  is the multistructural torsional anharmonicity factor calculated with the standard scale factor.

${}^b k_{SS-TST}^{HL}$  is the HL level calculation by conventional transition state theory without a transmission coefficient with the specific-reaction-parameter scale factor.

${}^c \Gamma_{SS-CVT}^{LL}$  is the LL recrossing transmission coefficient, which equals  $k_{SS-CVT}^{LL}/k_{SS-TST}^{LL}$  calculated with the standard scale factor.

${}^d k_{SS-SCT}^{LL}$  is the LL tunneling transmission coefficient calculated by the small-curvature tunneling approximation with the standard scale factor.

${}^e$ The high-pressure-limit rate coefficient given by eq S1. HL is CCSD(T)-F12a/cc-pVTZ//M06-2X/MG3S, and LL is M11-L/MG3S. This bimolecular reaction is considered to be independent of pressure, and so the high-pressure limit (HPL) applies at all pressures.

${}^f E_a$  is the Arrhenius activation energy (kcal/mol) for the high-pressure limit, which is

$$\frac{d \ln k_{2b}}{d(1/T)}$$

calculated as  $-R d(1/T)$ .



**Table S10.** Tunneling and recrossing transmission coefficients, torsional anharmonic factors, high-pressure-limit (HPL) rate coefficients ( $\text{cm}^3 \text{ molecule}^{-1} \text{ s}^{-1}$ ), and HPL activation energies (kcal/mol) for the  $\text{HO}_2 + \text{C}_4\text{H}_9\text{CHO}$  reaction (reaction R3 with lowest-energy transition structure TS1C and other conformers included by the multistructural torsional anharmonicity factor)

| $T(K)$ | $F_{fwd}^{MS-T}{}^a$ | $k_{SS-TST}^{HL}{}^b$ | $\Gamma_{SS-CVT}^{LL}{}^c$ | $k_{SS-SCT}^{LL}{}^d$ | $k_{R3}{}^e$ | $E_{af}{}^f$ |
|--------|----------------------|-----------------------|----------------------------|-----------------------|--------------|--------------|
| 190    | 1.39                 | 4.21E-13              | 3.45E-01                   | 4.75                  | 9.58E-13     | -3.06        |
| 200    | 1.39                 | 3.11E-13              | 3.65E-01                   | 4.06                  | 6.40E-13     | -3.00        |
| 210    | 1.39                 | 2.36E-13              | 3.84E-01                   | 3.56                  | 4.49E-13     | -2.94        |
| 220    | 1.39                 | 1.84E-13              | 4.02E-01                   | 3.17                  | 3.27E-13     | -2.88        |
| 230    | 1.39                 | 1.47E-13              | 4.18E-01                   | 2.87                  | 2.46E-13     | -2.83        |
| 240    | 1.40                 | 1.20E-13              | 4.34E-01                   | 2.63                  | 1.91E-13     | -2.77        |
| 250    | 1.40                 | 9.93E-14              | 4.49E-01                   | 2.44                  | 1.52E-13     | -2.71        |
| 260    | 1.40                 | 8.36E-14              | 4.64E-01                   | 2.28                  | 1.23E-13     | -2.66        |
| 270    | 1.40                 | 7.14E-14              | 4.77E-01                   | 2.15                  | 1.02E-13     | -2.61        |
| 280    | 1.40                 | 6.17E-14              | 4.90E-01                   | 2.03                  | 8.60E-14     | -2.55        |
| 290    | 1.40                 | 5.40E-14              | 5.02E-01                   | 1.94                  | 7.35E-14     | -2.50        |
| 298    | 1.40                 | 4.88E-14              | 5.11E-01                   | 1.87                  | 6.53E-14     | -2.46        |
| 300    | 1.40                 | 4.77E-14              | 5.13E-01                   | 1.85                  | 6.36E-14     | -2.45        |
| 310    | 1.40                 | 4.25E-14              | 5.24E-01                   | 1.78                  | 5.56E-14     | -2.40        |
| 320    | 1.40                 | 3.82E-14              | 5.34E-01                   | 1.72                  | 4.92E-14     | -2.35        |
| 330    | 1.40                 | 3.47E-14              | 5.43E-01                   | 1.67                  | 4.40E-14     | -2.30        |
| 340    | 1.40                 | 3.16E-14              | 5.52E-01                   | 1.62                  | 3.96E-14     | -2.25        |
| 350    | 1.40                 | 2.91E-14              | 5.61E-01                   | 1.57                  | 3.60E-14     | -2.20        |

${}^a F_{fwd}^{MS-T}$  is the multistructural torsional anharmonicity factor calculated with the standard scale factor.

${}^b k_{SS-TST}^{HL}$  is the HL level calculation by conventional transition state theory without a transmission coefficient with the specific-reaction-parameter scale factor.

${}^c \Gamma_{SS-CVT}^{LL}$  is the LL recrossing transmission coefficient, which equals  $k_{SS-CVT}^{LL}/k_{SS-TST}^{LL}$  calculated with the standard scale factor.

${}^d k_{SS-SCT}^{LL}$  is the LL tunneling transmission coefficient calculated by the small-curvature tunneling approximation with the standard scale factor.

${}^e$ The high-pressure-limit rate coefficient given by eq S1. HL is CCSD(T)-F12a/cc-pVTZ//M06-2X/MG3S, and LL is M11-L/MG3S.

${}^f E_{af}$  is Arrhenius activation energy (kcal/mol) for the high-pressure limit, which is

$$\text{calculated as } -R \overline{d \ln k_{3b} / d(1/T)} .$$

**Table S11.** Tunneling and recrossing transmission coefficients, torsional anharmonic factors, high-pressure-limit (HPL) rate coefficients ( $s^{-1}$ ), and HPL activation energies (kcal/mol) for reaction R4

| $T(K)$ | $F_{fwd}^{MS-T}{}^a$ | $k_{SS-TST}^{HL}{}^b$ | $\Gamma_{SS-CVT}^{LL}{}^c$ | $k_{SS-SCT}^{LL}{}^d$ | $k_{1u}{}^e$ | $E_{af}{}^f$ |
|--------|----------------------|-----------------------|----------------------------|-----------------------|--------------|--------------|
| 190    | 0.37                 | 1.24E-08              | 9.33E-01                   | 556.56                | 2.39E-06     | 12.98        |
| 200    | 0.34                 | 1.15E-07              | 9.34E-01                   | 336.35                | 1.24E-05     | 12.79        |
| 210    | 0.32                 | 8.59E-07              | 9.35E-01                   | 216.54                | 5.57E-05     | 12.66        |
| 220    | 0.30                 | 5.35E-06              | 9.35E-01                   | 146.87                | 2.19E-04     | 12.57        |
| 230    | 0.28                 | 2.84E-05              | 9.36E-01                   | 104.04                | 7.70E-04     | 12.52        |
| 240    | 0.26                 | 1.31E-04              | 9.36E-01                   | 76.47                 | 2.44E-03     | 12.50        |
| 250    | 0.24                 | 5.37E-04              | 9.36E-01                   | 57.98                 | 7.10E-03     | 12.51        |
| 260    | 0.23                 | 1.97E-03              | 9.36E-01                   | 45.17                 | 1.90E-02     | 12.55        |
| 270    | 0.21                 | 6.58E-03              | 9.37E-01                   | 36.01                 | 4.75E-02     | 12.61        |
| 280    | 0.20                 | 2.02E-02              | 9.37E-01                   | 29.30                 | 1.11E-01     | 12.69        |
| 290    | 0.19                 | 5.72E-02              | 9.37E-01                   | 24.27                 | 2.46E-01     | 12.78        |
| 298    | 0.18                 | 1.25E-01              | 9.37E-01                   | 21.11                 | 4.47E-01     | 12.87        |
| 300    | 0.18                 | 1.51E-01              | 9.37E-01                   | 20.41                 | 5.17E-01     | 12.90        |
| 310    | 0.17                 | 3.76E-01              | 9.37E-01                   | 17.42                 | 1.04E+00     | 13.03        |
| 320    | 0.16                 | 8.85E-01              | 9.37E-01                   | 15.04                 | 1.99E+00     | 13.17        |
| 330    | 0.15                 | 1.98E+00              | 9.37E-01                   | 13.14                 | 3.68E+00     | 13.32        |
| 340    | 0.14                 | 4.21E+00              | 9.37E-01                   | 11.59                 | 6.56E+00     | 13.49        |
| 350    | 0.14                 | 8.60E+00              | 9.37E-01                   | 10.32                 | 1.13E+01     | 13.67        |

${}^a F_{fwd}^{MS-T}$  is the multistructural torsional anharmonicity factor calculated with the standard scale factor.

${}^b k_{SS-TST}^{HL}$  is the HL level calculation by conventional transition state theory without a transmission coefficient with the specific-reaction-parameter scale factor.

${}^c \Gamma_{SS-CVT}^{LL}$  is the LL recrossing transmission coefficient, which equals  $k_{SS-CVT}^{LL}/k_{SS-TST}^{LL}$  calculated with the standard scale factor.

${}^d k_{SS-SCT}^{LL}$  is the LL tunneling transmission coefficient calculated by the small-curvature tunneling approximation with the standard scale factor.

${}^e$ The high-pressure-limit rate coefficient given by eq S1. HL is CCSD(T)-F12a/cc-pVTZ//M06-2X/MG3S, and LL is MM15-L/MG3S.

${}^f E_{af}$  is Arrhenius activation energy (kcal/mol) for the high-pressure limit, which is

$$\text{calculated as } -R \frac{d \ln k_{1u}}{d(1/T)} .$$

**Table S12.** The tunneling and recrossing transmission coefficients, the torsional anharmonic factors, high-pressure-limit (HPL) rate coefficients ( $s^{-1}$ ), and HPL activation energies (kcal/mol) for the M1B isomerism reaction (reaction R5 with lowest-energy transition structure TS2B)

| $T(K)$ | $F_{fwd}^{MS-T}{}^a$ | $k_{SS-TST}^{HL}{}^b$ | $\Gamma_{SS-CVT}^{LL}{}^c$ | $k_{SS-SCT}^{LL}{}^d$ | $k_{2u}{}^e$ | $E_{af}{}^f$ |
|--------|----------------------|-----------------------|----------------------------|-----------------------|--------------|--------------|
| 190    | 0.40                 | 6.81E-11              | 8.01E-01                   | 769.34                | 1.69E-08     | 14.63        |
| 200    | 0.38                 | 8.43E-10              | 8.06E-01                   | 421.96                | 1.08E-07     | 14.49        |
| 210    | 0.35                 | 8.21E-09              | 8.10E-01                   | 251.74                | 5.95E-07     | 14.42        |
| 220    | 0.33                 | 6.50E-08              | 8.14E-01                   | 160.70                | 2.85E-06     | 14.39        |
| 230    | 0.32                 | 4.30E-07              | 8.17E-01                   | 108.41                | 1.20E-05     | 14.40        |
| 240    | 0.30                 | 2.43E-06              | 8.20E-01                   | 76.58                 | 4.57E-05     | 14.45        |
| 250    | 0.28                 | 1.20E-05              | 8.22E-01                   | 56.22                 | 1.57E-04     | 14.53        |
| 260    | 0.27                 | 5.21E-05              | 8.25E-01                   | 42.64                 | 4.96E-04     | 14.63        |
| 270    | 0.26                 | 2.03E-04              | 8.27E-01                   | 33.27                 | 1.44E-03     | 14.76        |
| 280    | 0.25                 | 7.21E-04              | 8.29E-01                   | 26.59                 | 3.91E-03     | 14.90        |
| 290    | 0.24                 | 2.34E-03              | 8.30E-01                   | 21.70                 | 9.96E-03     | 15.06        |
| 298    | 0.23                 | 5.68E-03              | 8.31E-01                   | 18.69                 | 2.01E-02     | 15.20        |
| 300    | 0.23                 | 7.04E-03              | 8.32E-01                   | 18.04                 | 2.39E-02     | 15.24        |
| 310    | 0.22                 | 1.97E-02              | 8.33E-01                   | 15.24                 | 5.43E-02     | 15.43        |
| 320    | 0.21                 | 5.18E-02              | 8.34E-01                   | 13.06                 | 1.18E-01     | 15.63        |
| 330    | 0.20                 | 1.28E-01              | 8.35E-01                   | 11.34                 | 2.44E-01     | 15.85        |
| 340    | 0.19                 | 3.02E-01              | 8.36E-01                   | 9.95                  | 4.87E-01     | 16.07        |
| 350    | 0.19                 | 6.76E-01              | 8.36E-01                   | 8.83                  | 9.35E-01     | 16.30        |

<sup>a</sup> $F_{fwd}^{MS-T}$  is the multistructural torsional anharmonicity factor calculated with the standard scale factor.

<sup>b</sup> $k_{SS-TST}^{HL}$  is the HL level calculation by conventional transition state theory without a transmission coefficient with the specific-reaction-parameter scale factor.

<sup>c</sup> $\Gamma_{SS-CVT}^{LL}$  is the LL recrossing transmission coefficient, which equals  $k_{SS-CVT}^{LL}/k_{SS-TST}^{LL}$  calculated with the standard scale factor.

<sup>d</sup> $k_{SS-SCT}^{LL}$  is the LL tunneling transmission coefficient calculated by the small-curvature tunneling approximation with the standard scale factor.

<sup>e</sup>The high-pressure-limit rate coefficient given by eq S1. HL is CCSD(T)-F12a/cc-pVTZ//M06-2X/MG3S, and LL is MN15-L/MG3S.

<sup>f</sup> $E_{af}$  is Arrhenius activation energy (kcal/mol) for the high-pressure limit, which is

$$\text{calculated as } -R \frac{d \ln k_{2u}}{d(1/T)} .$$

**Table S13.** The tunneling and recrossing transmission coefficients, the torsional anharmonic factors, high-pressure-limit (HPL) rate coefficients ( $s^{-1}$ ), and HPL activation energies (kcal/mol) for the M1C isomerism reaction (reaction R6 with lowest-energy transition structure TS2C)

| $T(K)$ | $F_{fwd}^{MS-T}{}^a$ | $k_{SS-TST}^{HL}{}^b$ | $\Gamma_{SS-CVT}^{LL}{}^c$ | $k_{SS-SCT}^{LL}{}^d$ | $k_{3u}{}^e$ | $E_{a6f}$ |
|--------|----------------------|-----------------------|----------------------------|-----------------------|--------------|-----------|
| 190    | 0.41                 | 4.63E-13              | 8.16E-01                   | 355060.00             | 5.51E-08     | 9.33      |
| 200    | 0.39                 | 7.70E-12              | 8.20E-01                   | 81840.00              | 2.04E-07     | 9.56      |
| 210    | 0.38                 | 9.80E-11              | 8.24E-01                   | 21963.00              | 6.73E-07     | 9.86      |
| 220    | 0.37                 | 9.90E-10              | 8.27E-01                   | 6755.10               | 2.02E-06     | 10.23     |
| 230    | 0.35                 | 8.18E-09              | 8.30E-01                   | 2356.00               | 5.62E-06     | 10.65     |
| 240    | 0.34                 | 5.67E-08              | 8.32E-01                   | 925.82                | 1.48E-05     | 11.13     |
| 250    | 0.33                 | 3.37E-07              | 8.34E-01                   | 408.48                | 3.75E-05     | 11.65     |
| 260    | 0.32                 | 1.74E-06              | 8.36E-01                   | 201.72                | 9.30E-05     | 12.21     |
| 270    | 0.31                 | 7.99E-06              | 8.38E-01                   | 110.92                | 2.27E-04     | 12.81     |
| 280    | 0.30                 | 3.29E-05              | 8.40E-01                   | 67.30                 | 5.50E-04     | 13.44     |
| 290    | 0.29                 | 1.23E-04              | 8.41E-01                   | 44.48                 | 1.32E-03     | 14.09     |
| 298    | 0.28                 | 3.31E-04              | 8.42E-01                   | 33.63                 | 2.62E-03     | 14.63     |
| 300    | 0.28                 | 4.20E-04              | 8.42E-01                   | 31.56                 | 3.11E-03     | 14.77     |
| 310    | 0.27                 | 1.33E-03              | 8.43E-01                   | 23.70                 | 7.16E-03     | 15.47     |
| 320    | 0.26                 | 3.91E-03              | 8.44E-01                   | 18.60                 | 1.61E-02     | 16.19     |
| 330    | 0.25                 | 1.08E-02              | 8.45E-01                   | 15.12                 | 3.51E-02     | 16.94     |
| 340    | 0.25                 | 2.81E-02              | 8.46E-01                   | 12.63                 | 7.43E-02     | 17.69     |
| 350    | 0.24                 | 6.91E-02              | 8.47E-01                   | 10.78                 | 1.52E-01     | 18.47     |

<sup>a</sup> $F_{fwd}^{MS-T}$  is the multistructural torsional anharmonicity factor calculated with the standard scale factor.

<sup>b</sup> $k_{SS-TST}^{HL}$  is the HL level calculation by conventional transition state theory without a transmission coefficient with the specific-reaction-parameter scale factor.

<sup>c</sup> $\Gamma_{SS-CVT}^{LL}$  is the LL recrossing transmission coefficient, which equals  $k_{SS-CVT}^{LL}/k_{SS-TST}^{LL}$  calculated with the standard scale factor.

<sup>d</sup> $k_{SS-SCT}^{LL}$  is the LL tunneling transmission coefficient calculated by the small-curvature tunneling approximation with the standard scale factor.

<sup>e</sup>The high-pressure-limit rate coefficient given by eq S1. HL is CCSD(T)-F12a/cc-pVTZ//M06-2X/MG3S, and LL is MN15-L/MG3S.

<sup>f</sup> $E_{a6f}$  is Arrhenius activation energy (kcal/mol) for the high-pressure limit, which is

$$\text{calculated as } -R \overline{d(\ln k_{3u})/d(1/T)} .$$

**Table S14.** Fitting parameters for the high-pressure-limit (HPL) rate coefficients<sup>a</sup>

| Rate coefficient       | Reaction | ln A   | <i>n</i> | <i>E</i> | <i>T</i> <sub>0</sub> |
|------------------------|----------|--------|----------|----------|-----------------------|
| <i>k</i> <sub>R1</sub> | R1       | -36.38 | 1.98     | -3.13    | 18.74                 |
| <i>k</i> <sub>R2</sub> | R2       | -35.64 | 1.74     | -3.08    | 18.80                 |
| <i>k</i> <sub>R3</sub> | R3       | -36.25 | 2.04     | -3.23    | 18.77                 |
| <i>k</i> <sub>1u</sub> | R4       | -1.72  | 17.29    | -6.55    | -89.02                |
| <i>k</i> <sub>2u</sub> | R5       | -1.86  | 19.04    | -4.78    | -92.25                |
| <i>k</i> <sub>3u</sub> | R6       | -39.25 | 50.73    | -27.90   | -37.69                |

<sup>a</sup> *A* is in cc molecule<sup>-1</sup> s<sup>-1</sup>; *n* is unitless; *E* is in kcal/mol; and *T*<sub>0</sub> is in K.

**Table S15.** The conventional transition state theory (TST) rate coefficients (10<sup>-14</sup> cm<sup>3</sup> molecule<sup>-1</sup> s<sup>-1</sup>) without a transmission coefficient for the HO<sub>2</sub> + RCHO (R = C<sub>5</sub>H<sub>11</sub>, C<sub>4</sub>H<sub>9</sub>, and C<sub>3</sub>H<sub>7</sub>) reactions and the resulting multistructural torsional anharmonicity factors<sup>a,b,c</sup>

| <i>T</i> (K) | R1                                       |                                           | R2                                       |                                           | R3                                       |                                           | <i>F</i> <sub>fwd</sub> <sup>MS-T</sup> | <i>F</i> <sub>fwd</sub> <sup>MS-T</sup> | <i>F</i> <sub>fwd</sub> <sup>MS-T</sup> |
|--------------|------------------------------------------|-------------------------------------------|------------------------------------------|-------------------------------------------|------------------------------------------|-------------------------------------------|-----------------------------------------|-----------------------------------------|-----------------------------------------|
|              | <i>k</i> <sub>SS-TST</sub> <sup>HL</sup> | <i>k</i> <sub>SS-TST</sub> <sup>HLS</sup> | <i>k</i> <sub>SS-TST</sub> <sup>HL</sup> | <i>k</i> <sub>SS-TST</sub> <sup>HLS</sup> | <i>k</i> <sub>SS-TST</sub> <sup>HL</sup> | <i>k</i> <sub>SS-TST</sub> <sup>HLS</sup> |                                         |                                         |                                         |
| 190          | 31.6                                     | 14.1                                      | 37.5                                     | 14.7                                      | 42.1                                     | 16.1                                      | 2.24                                    | 2.55                                    | 2.61                                    |
| 200          | 23.6                                     | 11.0                                      | 27.8                                     | 11.5                                      | 31.1                                     | 12.5                                      | 2.15                                    | 2.43                                    | 2.48                                    |
| 210          | 18.2                                     | 8.78                                      | 21.2                                     | 9.16                                      | 23.6                                     | 9.96                                      | 2.07                                    | 2.32                                    | 2.37                                    |
| 220          | 14.3                                     | 7.17                                      | 16.6                                     | 7.46                                      | 18.4                                     | 8.10                                      | 2.00                                    | 2.23                                    | 2.28                                    |
| 230          | 11.5                                     | 5.97                                      | 13.3                                     | 6.20                                      | 14.7                                     | 6.71                                      | 1.94                                    | 2.15                                    | 2.19                                    |
| 240          | 9.49                                     | 5.05                                      | 10.9                                     | 5.24                                      | 1.20                                     | 5.66                                      | 1.88                                    | 2.08                                    | 2.12                                    |
| 250          | 7.93                                     | 4.33                                      | 9.05                                     | 4.49                                      | 9.93                                     | 4.84                                      | 1.83                                    | 2.02                                    | 2.05                                    |
| 260          | 6.73                                     | 3.77                                      | 7.64                                     | 3.90                                      | 8.36                                     | 4.19                                      | 1.78                                    | 1.96                                    | 1.99                                    |
| 270          | 5.78                                     | 3.32                                      | 6.54                                     | 3.43                                      | 7.14                                     | 3.68                                      | 1.74                                    | 1.91                                    | 1.94                                    |
| 280          | 5.03                                     | 2.95                                      | 5.67                                     | 3.05                                      | 6.17                                     | 3.26                                      | 1.71                                    | 1.86                                    | 1.89                                    |
| 290          | 4.43                                     | 2.65                                      | 4.97                                     | 2.73                                      | 5.40                                     | 2.92                                      | 1.67                                    | 1.82                                    | 1.85                                    |
| 298          | 4.02                                     | 2.44                                      | 4.50                                     | 2.52                                      | 4.88                                     | 2.69                                      | 1.64                                    | 1.79                                    | 1.81                                    |
| 300          | 3.93                                     | 2.40                                      | 4.40                                     | 2.47                                      | 4.77                                     | 2.64                                      | 1.64                                    | 1.78                                    | 1.81                                    |
| 310          | 3.53                                     | 2.19                                      | 3.93                                     | 2.25                                      | 4.25                                     | 2.40                                      | 1.61                                    | 1.75                                    | 1.77                                    |
| 320          | 3.19                                     | 2.01                                      | 3.54                                     | 2.07                                      | 3.82                                     | 2.20                                      | 1.59                                    | 1.71                                    | 1.74                                    |
| 330          | 2.90                                     | 1.86                                      | 3.22                                     | 1.91                                      | 3.47                                     | 2.03                                      | 1.56                                    | 1.68                                    | 1.71                                    |
| 340          | 2.66                                     | 1.73                                      | 2.94                                     | 1.78                                      | 3.16                                     | 1.89                                      | 1.54                                    | 1.65                                    | 1.68                                    |
| 350          | 2.45                                     | 1.62                                      | 2.71                                     | 1.66                                      | 2.91                                     | 1.76                                      | 1.52                                    | 1.63                                    | 1.65                                    |

<sup>a</sup> *k*<sub>SS-TST</sub><sup>HL</sup> is the conventional transition state theory rate coefficient calculated using the specific reaction parameter scale factor.

<sup>b</sup> *k*<sub>SS-TST</sub><sup>HLS</sup> is the conventional transition state theory rate coefficients calculated using the standard scale factor.

<sup>c</sup> *F*<sub>fwd</sub><sup>MS-T</sup> is *k*<sub>SS-TST</sub><sup>HL</sup>/*k*<sub>SS-TST</sub><sup>HLS</sup>



**Table S16.** The conventional transition state theory (TST) rate coefficients ( $\text{cm}^3 \text{ molecule}^{-1} \text{ s}^{-1}$ ) without a transmission coefficient for reactions R4–R6 and the resulting multistructural torsional anharmonicity factors<sup>a,b,c</sup>

| $T(K)$ | R4                |                    | R5                |                    | R6                |                    | R4   | R5   | R6   |
|--------|-------------------|--------------------|-------------------|--------------------|-------------------|--------------------|------|------|------|
|        | $k_{SS-TST}^{HL}$ | $k_{SS-TST}^{HLS}$ | $k_{SS-TST}^{HL}$ | $k_{SS-TST}^{HLS}$ | $k_{SS-TST}^{HL}$ | $k_{SS-TST}^{HLS}$ |      |      |      |
| 190    | 1.24E-8           | 6.64E-9            | 6.81E-11          | 4.01E-11           | 4.63E-13          | 2.41E-13           | 1.87 | 1.70 | 1.92 |
| 200    | 1.15E-7           | 6.32E-8            | 8.43E-10          | 5.09E-10           | 7.70E-12          | 4.15E-12           | 1.82 | 1.66 | 1.86 |
| 210    | 8.59E-7           | 4.86E-7            | 8.21E-9           | 5.07E-9            | 9.80E-11          | 5.43E-11           | 1.77 | 1.62 | 1.81 |
| 220    | 5.35E-6           | 3.10E-6            | 6.50E-8           | 4.10E-8            | 9.90E-10          | 5.63E-10           | 1.73 | 1.59 | 1.76 |
| 230    | 2.84E-5           | 1.68E-5            | 4.30E-7           | 2.77E-7            | 8.18E-9           | 4.76E-9            | 1.69 | 1.56 | 1.72 |
| 240    | 1.31E-4           | 7.95E-5            | 2.43E-6           | 1.59E-6            | 5.67E-8           | 3.37E-8            | 1.65 | 1.53 | 1.68 |
| 250    | 5.37E-4           | 3.31E-4            | 1.20E-5           | 7.95E-6            | 3.37E-7           | 2.04E-7            | 1.62 | 1.50 | 1.65 |
| 260    | 1.97E-3           | 1.24E-3            | 5.21E-5           | 3.51E-5            | 1.74E-6           | 1.08E-6            | 1.59 | 1.48 | 1.62 |
| 270    | 6.58E-3           | 4.20E-3            | 2.03E-4           | 1.39E-4            | 7.99E-6           | 5.02E-6            | 1.57 | 1.46 | 1.59 |
| 280    | 2.02E-2           | 1.31E-2            | 7.21E-4           | 4.99E-4            | 3.29E-5           | 2.10E-5            | 1.54 | 1.44 | 1.57 |
| 290    | 5.72E-2           | 3.75E-2            | 2.34E-3           | 1.64E-3            | 1.23E-4           | 7.95E-5            | 1.52 | 1.43 | 1.55 |
| 298    | 1.25E-1           | 8.31E-2            | 5.68E-3           | 4.02E-3            | 3.31E-4           | 2.16E-4            | 1.50 | 1.41 | 1.53 |
| 300    | 1.51E-1           | 1.01E-1            | 7.04E-3           | 4.99E-3            | 4.20E-4           | 2.76E-4            | 1.50 | 1.41 | 1.53 |
| 310    | 3.76E-1           | 2.53E-1            | 1.97E-2           | 1.41E-2            | 1.33E-3           | 8.82E-4            | 1.49 | 1.40 | 1.51 |
| 320    | 8.85E-1           | 6.02E-1            | 5.18E-2           | 3.74E-2            | 3.91E-3           | 2.63E-3            | 1.47 | 1.38 | 1.49 |
| 330    | 1.98              | 1.36               | 1.28E-1           | 9.36E-2            | 1.08E-2           | 7.33E-3            | 1.45 | 1.37 | 1.47 |
| 340    | 4.21              | 2.93               | 3.02E-1           | 2.22E-1            | 2.81E-2           | 1.92E-2            | 1.44 | 1.36 | 1.46 |
| 350    | 8.60              | 6.03               | 6.76E-1           | 5.01E-1            | 6.91E-2           | 4.79E-2            | 1.43 | 1.35 | 1.44 |

<sup>a</sup> $k_{SS-TST}^{HL}$  is the conventional transition state theory rate coefficient calculated using the specific reaction parameter scale factor.

<sup>b</sup> $k_{SS-TST}^{HLS}$  is the conventional transition state theory rate coefficients calculated using the standard scale factor.

<sup>c</sup> $F_{fwd}^{MS-T}$  is  $k_{SS-TST}^{HL}/k_{SS-TST}^{HLS}$

**Table S17.** The falloff factor  $f(1 \text{ bar})$  (unitless) calculated by SS-QRRK and by ME/RRKM for reactions R1–R3 as functions of temperature

| $T(K)$ | R1<br>$\text{HO}_2 + \text{C}_3\text{H}_{11}\text{CHO}$ |                      | R2<br>$\text{HO}_2 + \text{C}_4\text{H}_9\text{CHO}$ |                      | R3<br>$\text{HO}_2 + \text{C}_3\text{H}_7\text{CHO}$ |                      |
|--------|---------------------------------------------------------|----------------------|------------------------------------------------------|----------------------|------------------------------------------------------|----------------------|
|        | SS-QRRK <sup>b</sup>                                    | ME/RRKM <sup>c</sup> | SS-QRRK <sup>b</sup>                                 | ME/RRKM <sup>c</sup> | SS-QRRK <sup>b</sup>                                 | ME/RRKM <sup>c</sup> |
| 190    | 1.04                                                    | 1.02                 | 1.02                                                 | 1.01                 | 1.02                                                 | 1.01                 |
| 230    | 1.11                                                    | 1.12                 | 1.04                                                 | 1.04                 | 1.04                                                 | 1.04                 |
| 250    | 1.17                                                    | 1.23                 | 1.06                                                 | 1.08                 | 1.06                                                 | 1.08                 |
| 270    | 1.26                                                    | 1.40                 | 1.09                                                 | 1.14                 | 1.09                                                 | 1.14                 |
| 298    | 1.48                                                    | 1.80                 | 1.16                                                 | 1.30                 | 1.15                                                 | 1.27                 |
| 310    | 1.63                                                    | 2.04                 | 1.21                                                 | 1.40                 | 1.19                                                 | 1.35                 |
| 330    | 1.99                                                    | 2.59                 | 1.33                                                 | 1.61                 | 1.29                                                 | 1.53                 |
| 350    | 2.57                                                    | 3.39                 | 1.51                                                 | 1.91                 | 1.45                                                 | 1.78                 |

<sup>a</sup>The falloff effect defined as the ratio of  $k_\infty(T)$  to  $k(T, p)$ .

<sup>b</sup>The SS-QRRK falloff effects are obtained by the system-specific quantum Rice–Ramsperger–Kassel method.

<sup>c</sup>The ME/RRKM falloff effects are obtained by the master equation with Rice–Ramsperger–Kassel–Marcus microcanonical rate constants. Note that Rice–Ramsperger–Kassel–Marcus microcanonical rate constants are the same as conventional transition state theory rate constants for a unimolecular process.



**Table S18A.** The pressure-dependent rate coefficient  $k(T,p)$  (in  $\text{cm}^3 \text{ molecule}^{-1} \text{ s}^{-1}$ ) of  $\text{HO}_2 + \text{C}_5\text{H}_{11}\text{CHO}$  (reaction R1) reaction as calculated by dual-level DL-MS-CVT/SCT /SS-QRRK<sup>a</sup>

|                 |          |          |          |          |
|-----------------|----------|----------|----------|----------|
| $p(\text{bar})$ | 350 K    | 330 K    | 310 K    | 298 K    |
| 0.0316          | 7.35E-16 | 1.44E-15 | 2.81E-15 | 4.16E-15 |
| 0.1             | 2.11E-15 | 3.98E-15 | 7.38E-15 | 1.06E-14 |
| 0.178           | 3.41E-15 | 6.21E-15 | 1.11E-14 | 1.55E-14 |
| 0.316           | 5.23E-15 | 9.13E-15 | 1.55E-14 | 2.11E-14 |
| 0.562           | 7.58E-15 | 1.26E-14 | 2.04E-14 | 2.68E-14 |
| 1               | 1.04E-14 | 1.63E-14 | 2.51E-14 | 3.22E-14 |
| 1.78            | 1.34E-14 | 2.00E-14 | 2.94E-14 | 3.68E-14 |
| 3.16            | 1.64E-14 | 2.34E-14 | 3.30E-14 | 4.04E-14 |
| 5.62            | 1.91E-14 | 2.62E-14 | 3.57E-14 | 4.30E-14 |
| 10              | 2.15E-14 | 2.84E-14 | 3.76E-14 | 4.47E-14 |
| 31.6            | 2.46E-14 | 3.09E-14 | 3.97E-14 | 4.65E-14 |
| 50              | 2.53E-14 | 3.15E-14 | 4.01E-14 | 4.69E-14 |
| 100             | 2.60E-14 | 3.20E-14 | 4.04E-14 | 4.72E-14 |
| 1000            | 2.67E-14 | 3.24E-14 | 4.08E-14 | 4.75E-14 |
| $p(\text{bar})$ | 270 K    | 250 K    | 230 K    | 190 K    |
| 0.0316          | 1.05E-14 | 2.09E-14 | 4.36E-14 | 2.90E-13 |
| 0.1             | 2.44E-14 | 4.53E-14 | 8.74E-14 | 4.61E-13 |
| 0.178           | 3.36E-14 | 5.96E-14 | 1.10E-13 | 5.24E-13 |
| 0.316           | 4.29E-14 | 7.29E-14 | 1.30E-13 | 5.69E-13 |
| 0.562           | 5.14E-14 | 8.41E-14 | 1.44E-13 | 5.98E-13 |
| 1               | 5.83E-14 | 9.25E-14 | 1.55E-13 | 6.15E-13 |
| 1.78            | 6.36E-14 | 9.83E-14 | 1.62E-13 | 6.26E-13 |
| 3.16            | 6.72E-14 | 1.02E-13 | 1.66E-13 | 6.32E-13 |
| 5.62            | 6.96E-14 | 1.05E-13 | 1.69E-13 | 6.35E-13 |
| 10              | 7.11E-14 | 1.06E-13 | 1.70E-13 | 6.37E-13 |
| 31.6            | 7.26E-14 | 1.07E-13 | 1.71E-13 | 6.39E-13 |
| 50              | 7.28E-14 | 1.08E-13 | 1.72E-13 | 6.39E-13 |
| 100             | 7.31E-14 | 1.08E-13 | 1.72E-13 | 6.40E-13 |
| 1000            | 7.33E-14 | 1.08E-13 | 1.72E-13 | 6.40E-13 |

<sup>a</sup>The specific reaction parameter scale factor and multistructural torsional anharmonicity factor are used. The HPL rate constants in this table agree with those in Table S8.

**Table S18B.** The temperature–pressure dependent rate coefficient  $k(T,p)$  (in  $\text{cm}^3 \text{ molecule}^{-1} \text{ s}^{-1}$ ) of  $\text{HO}_2 + \text{C}_5\text{H}_{11}\text{CHO}$  (reaction R1) reaction as calculated by the ME/RRKM with the higher level of electronic structure<sup>a</sup> (CCSD(T)-F12a/cc-pVTZ-F12//M06-2X/MG3S)

|                 |          |          |          |          |
|-----------------|----------|----------|----------|----------|
| $p(\text{bar})$ | 350 K    | 330 K    | 310 K    | 298 K    |
| 0.0316          | 3.34E-16 | 6.48E-16 | 1.29E-15 | 1.96E-15 |
| 0.1             | 7.66E-16 | 1.40E-15 | 2.59E-15 | 3.77E-15 |
| 0.178           | 1.12E-15 | 1.98E-15 | 3.53E-15 | 5.03E-15 |
| 0.316           | 1.60E-15 | 2.73E-15 | 4.68E-15 | 6.51E-15 |
| 0.562           | 2.23E-15 | 3.65E-15 | 6.02E-15 | 8.16E-15 |
| 1               | 3.01E-15 | 4.74E-15 | 7.50E-15 | 9.90E-15 |
| 1.78            | 3.92E-15 | 5.94E-15 | 9.02E-15 | 1.16E-14 |
| 3.16            | 4.93E-15 | 7.18E-15 | 1.05E-14 | 1.32E-14 |
| 5.62            | 5.99E-15 | 8.39E-15 | 1.18E-14 | 1.46E-14 |
| 10              | 7.00E-15 | 9.47E-15 | 1.29E-14 | 1.56E-14 |
| 31.6            | 8.66E-15 | 1.11E-14 | 1.43E-14 | 1.70E-14 |
| 50              | 9.13E-15 | 1.15E-14 | 1.47E-14 | 1.73E-14 |
| 100             | 9.64E-15 | 1.19E-14 | 1.50E-14 | 1.75E-14 |
| 1000            | 1.02E-14 | 1.23E-14 | 1.53E-14 | 1.78E-14 |
| $p(\text{bar})$ | 270 K    | 250 K    | 230 K    | 190 K    |
| 0.0316          | 5.47E-15 | 1.18E-14 | 2.64E-14 | 1.64E-13 |
| 0.1             | 9.37E-15 | 1.84E-14 | 3.75E-14 | 1.93E-13 |
| 0.178           | 1.18E-14 | 2.21E-14 | 4.28E-14 | 2.03E-13 |
| 0.316           | 1.43E-14 | 2.56E-14 | 4.76E-14 | 2.11E-13 |
| 0.562           | 1.68E-14 | 2.89E-14 | 5.17E-14 | 2.16E-13 |
| 1               | 1.93E-14 | 3.18E-14 | 5.49E-14 | 2.20E-13 |
| 1.78            | 2.14E-14 | 3.41E-14 | 5.73E-14 | 2.22E-13 |
| 3.16            | 2.31E-14 | 3.58E-14 | 5.89E-14 | 2.23E-13 |
| 5.62            | 2.45E-14 | 3.71E-14 | 6.00E-14 | 2.24E-13 |
| 10              | 2.54E-14 | 3.79E-14 | 6.07E-14 | 2.25E-13 |
| 31.6            | 2.64E-14 | 3.87E-14 | 6.14E-14 | 2.25E-13 |
| 50              | 2.66E-14 | 3.89E-14 | 6.15E-14 | 2.25E-13 |
| 100             | 2.68E-14 | 3.90E-14 | 6.16E-14 | 2.25E-13 |
| 1000            | 2.70E-14 | 3.91E-14 | 6.17E-14 | 2.25E-13 |

<sup>a</sup>The standard scale factor is used.

**Table S19A.** The temperature–pressure dependent rate coefficient  $k(T,p)$  (in  $\text{cm}^3 \text{ molecule}^{-1} \text{ s}^{-1}$ ) of  $\text{HO}_2 + \text{C}_4\text{H}_9\text{CHO}$  (reaction R2) reaction as calculated by dual-level DL-MS-CVT/SCT /SS-QRRK

|                 |          |          |          |          |
|-----------------|----------|----------|----------|----------|
| $p(\text{bar})$ | 350 K    | 330 K    | 310 K    | 298 K    |
| 0.0316          | 4.85E-15 | 8.67E-15 | 1.53E-14 | 2.15E-14 |
| 0.1             | 1.15E-14 | 1.92E-14 | 3.14E-14 | 4.19E-14 |
| 0.178           | 1.63E-14 | 2.59E-14 | 4.05E-14 | 5.27E-14 |
| 0.316           | 2.16E-14 | 3.28E-14 | 4.92E-14 | 6.25E-14 |
| 0.562           | 2.72E-14 | 3.95E-14 | 5.68E-14 | 7.07E-14 |
| 1               | 3.25E-14 | 4.53E-14 | 6.30E-14 | 7.70E-14 |
| 1.78            | 3.71E-14 | 5.00E-14 | 6.76E-14 | 8.15E-14 |
| 3.16            | 4.09E-14 | 5.35E-14 | 7.08E-14 | 8.46E-14 |
| 5.62            | 4.38E-14 | 5.60E-14 | 7.29E-14 | 8.65E-14 |
| 10              | 4.58E-14 | 5.76E-14 | 7.42E-14 | 8.77E-14 |
| 31.6            | 4.79E-14 | 5.93E-14 | 7.55E-14 | 8.88E-14 |
| 50              | 4.83E-14 | 5.96E-14 | 7.57E-14 | 8.90E-14 |
| 100             | 4.87E-14 | 5.98E-14 | 7.59E-14 | 8.91E-14 |
| 1000            | 4.91E-14 | 6.01E-14 | 7.61E-14 | 8.93E-14 |
| $p(\text{bar})$ | 270 K    | 250 K    | 230 K    | 190 K    |
| 0.0316          | 4.77E-14 | 8.61E-14 | 1.65E-13 | 8.86E-13 |
| 0.1             | 8.33E-14 | 1.40E-13 | 2.48E-13 | 1.11E-12 |
| 0.178           | 9.93E-14 | 1.61E-13 | 2.78E-13 | 1.17E-12 |
| 0.316           | 1.12E-13 | 1.77E-13 | 2.98E-13 | 1.21E-12 |
| 0.562           | 1.22E-13 | 1.88E-13 | 3.12E-13 | 1.23E-12 |
| 1               | 1.29E-13 | 1.96E-13 | 3.21E-13 | 1.24E-12 |
| 1.78            | 1.33E-13 | 2.00E-13 | 3.26E-13 | 1.25E-12 |
| 3.16            | 1.36E-13 | 2.03E-13 | 3.29E-13 | 1.25E-12 |
| 5.62            | 1.38E-13 | 2.05E-13 | 3.31E-13 | 1.26E-12 |
| 10              | 1.39E-13 | 2.06E-13 | 3.32E-13 | 1.26E-12 |
| 31.6            | 1.40E-13 | 2.07E-13 | 3.33E-13 | 1.26E-12 |
| 50              | 1.40E-13 | 2.07E-13 | 3.33E-13 | 1.26E-12 |
| 100             | 1.40E-13 | 2.07E-13 | 3.33E-13 | 1.26E-12 |
| 1000            | 1.40E-13 | 2.07E-13 | 3.33E-13 | 1.26E-12 |

<sup>a</sup>The specific reaction parameter scale factor and multistructural torsional anharmonicity factor are used. The HPL rate constants in this table agree with those in Table S9.

**Table S19B.** The temperature–pressure dependent rate coefficient  $k(T,p)$  (in  $\text{cm}^3 \text{ molecule}^{-1} \text{ s}^{-1}$ ) of  $\text{HO}_2 + \text{C}_4\text{H}_9\text{CHO}$  (reaction R2) reaction as calculated by the ME/RRKM with the higher level of electronic structure<sup>a</sup> (CCSD(T)-F12a/cc-pVTZ-F12//M06-2X/MG3S)

|                 |          |          |          |          |
|-----------------|----------|----------|----------|----------|
| $p(\text{bar})$ | 350 K    | 330 K    | 310 K    | 298 K    |
| 0.0316          | 9.97E-16 | 1.77E-15 | 3.18E-15 | 4.56E-15 |
| 0.1             | 1.99E-15 | 3.30E-15 | 5.53E-15 | 7.56E-15 |
| 0.178           | 2.70E-15 | 4.33E-15 | 6.97E-15 | 9.31E-15 |
| 0.316           | 3.56E-15 | 5.49E-15 | 8.50E-15 | 1.11E-14 |
| 0.562           | 4.54E-15 | 6.74E-15 | 1.01E-14 | 1.28E-14 |
| 1               | 5.59E-15 | 8.00E-15 | 1.15E-14 | 1.44E-14 |
| 1.78            | 6.66E-15 | 9.20E-15 | 1.28E-14 | 1.57E-14 |
| 3.16            | 7.65E-15 | 1.02E-14 | 1.38E-14 | 1.67E-14 |
| 5.62            | 8.52E-15 | 1.11E-14 | 1.46E-14 | 1.74E-14 |
| 10              | 9.23E-15 | 1.17E-14 | 1.52E-14 | 1.79E-14 |
| 31.6            | 1.01E-14 | 1.25E-14 | 1.58E-14 | 1.84E-14 |
| 50              | 1.03E-14 | 1.26E-14 | 1.59E-14 | 1.85E-14 |
| 100             | 1.05E-14 | 1.28E-14 | 1.60E-14 | 1.86E-14 |
| 1000            | 1.07E-14 | 1.29E-14 | 1.61E-14 | 1.87E-14 |
| $p(\text{bar})$ | 270 K    | 250 K    | 230 K    | 190 K    |
| 0.0316          | 1.09E-14 | 2.08E-14 | 4.15E-14 | 2.12E-13 |
| 0.1             | 1.61E-14 | 2.83E-14 | 5.20E-14 | 2.31E-13 |
| 0.178           | 1.87E-14 | 3.16E-14 | 5.61E-14 | 2.37E-13 |
| 0.316           | 2.11E-14 | 3.45E-14 | 5.93E-14 | 2.41E-13 |
| 0.562           | 2.32E-14 | 3.67E-14 | 6.17E-14 | 2.43E-13 |
| 1               | 2.49E-14 | 3.84E-14 | 6.34E-14 | 2.45E-13 |
| 1.78            | 2.61E-14 | 3.96E-14 | 6.45E-14 | 2.46E-13 |
| 3.16            | 2.70E-14 | 4.04E-14 | 6.51E-14 | 2.46E-13 |
| 5.62            | 2.76E-14 | 4.09E-14 | 6.55E-14 | 2.47E-13 |
| 10              | 2.80E-14 | 4.12E-14 | 6.58E-14 | 2.47E-13 |
| 31.6            | 2.84E-14 | 4.15E-14 | 6.60E-14 | 2.47E-13 |
| 50              | 2.84E-14 | 4.15E-14 | 6.60E-14 | 2.47E-13 |
| 100             | 2.85E-14 | 4.16E-14 | 6.61E-14 | 2.47E-13 |
| 1000            | 2.85E-14 | 4.16E-14 | 6.61E-14 | 2.47E-13 |

<sup>a</sup>The standard scale factor is used.

**Table S20A.** The temperature–pressure dependent rate coefficient  $k(T,p)$  (in  $\text{cm}^3 \text{ molecule}^{-1} \text{ s}^{-1}$ ) of  $\text{HO}_2 + \text{C}_3\text{H}_7\text{CHO}$  (reaction R3) reaction as calculated by dual-level DL-MS-CVT/SCT /SS-QRRK

|                 |          |          |          |          |
|-----------------|----------|----------|----------|----------|
| $p(\text{bar})$ | 350 K    | 330 K    | 310 K    | 298 K    |
| 0.0316          | 3.81E-15 | 6.73E-15 | 1.14E-14 | 1.57E-14 |
| 0.1             | 9.10E-15 | 1.49E-14 | 2.36E-14 | 3.11E-14 |
| 0.178           | 1.28E-14 | 2.01E-14 | 3.04E-14 | 3.92E-14 |
| 0.316           | 1.69E-14 | 2.52E-14 | 3.68E-14 | 4.64E-14 |
| 0.562           | 2.10E-14 | 3.00E-14 | 4.23E-14 | 5.23E-14 |
| 1               | 2.48E-14 | 3.42E-14 | 4.67E-14 | 5.68E-14 |
| 1.78            | 2.81E-14 | 3.74E-14 | 4.99E-14 | 6.00E-14 |
| 3.16            | 3.07E-14 | 3.98E-14 | 5.21E-14 | 6.21E-14 |
| 5.62            | 3.26E-14 | 4.14E-14 | 5.35E-14 | 6.34E-14 |
| 10              | 3.39E-14 | 4.24E-14 | 5.44E-14 | 6.42E-14 |
| 31.6            | 3.53E-14 | 4.35E-14 | 5.52E-14 | 6.49E-14 |
| 50              | 3.55E-14 | 4.37E-14 | 5.53E-14 | 6.51E-14 |
| 100             | 3.58E-14 | 4.38E-14 | 5.55E-14 | 6.52E-14 |
| 1000            | 3.60E-14 | 4.40E-14 | 5.56E-14 | 6.53E-14 |
| $p(\text{bar})$ | 270 K    | 250 K    | 230 K    | 190 K    |
| 0.0316          | 3.35E-14 | 5.97E-14 | 1.13E-13 | 6.17E-13 |
| 0.1             | 5.99E-14 | 9.99E-14 | 1.77E-13 | 8.14E-13 |
| 0.178           | 7.20E-14 | 1.16E-13 | 2.01E-13 | 8.70E-13 |
| 0.316           | 8.16E-14 | 1.29E-13 | 2.18E-13 | 9.06E-13 |
| 0.562           | 8.89E-14 | 1.38E-13 | 2.29E-13 | 9.28E-13 |
| 1               | 9.39E-14 | 1.43E-13 | 2.36E-13 | 9.41E-13 |
| 1.78            | 9.71E-14 | 1.47E-13 | 2.40E-13 | 9.48E-13 |
| 3.16            | 9.91E-14 | 1.49E-13 | 2.43E-13 | 9.53E-13 |
| 5.62            | 1.00E-13 | 1.50E-13 | 2.44E-13 | 9.55E-13 |
| 10              | 1.01E-13 | 1.51E-13 | 2.45E-13 | 9.56E-13 |
| 31.6            | 1.02E-13 | 1.52E-13 | 2.46E-13 | 9.57E-13 |
| 50              | 1.02E-13 | 1.52E-13 | 2.46E-13 | 9.58E-13 |
| 100             | 1.02E-13 | 1.52E-13 | 2.46E-13 | 9.58E-13 |
| 1000            | 1.02E-13 | 1.52E-13 | 2.46E-13 | 9.58E-13 |

<sup>a</sup>The specific reaction parameter scale factor and multistructural torsional anharmonicity factor are used. The HPL rate constants in this table agree with those in Table S10.

**Table S20B.** The temperature–pressure dependent rate coefficient  $k(T,p)$  (in  $\text{cm}^3 \text{ molecule}^{-1} \text{ s}^{-1}$ ) of  $\text{HO}_2 + \text{C}_3\text{H}_7\text{CHO}$  (reaction R3) reaction as calculated by the ME/RRKM with the higher level of electronic structure<sup>a</sup> (CCSD(T)-F12a/cc-pVTZ-F12//M06-2X/MG3S)

|                 |          |          |          |          |
|-----------------|----------|----------|----------|----------|
| $p(\text{bar})$ | 350 K    | 330 K    | 310 K    | 298K     |
| 0.0316          | 1.27E-15 | 2.18E-15 | 3.80E-15 | 5.35E-15 |
| 0.1             | 2.46E-15 | 3.96E-15 | 6.45E-15 | 8.70E-15 |
| 0.178           | 3.28E-15 | 5.11E-15 | 8.04E-15 | 1.06E-14 |
| 0.316           | 4.24E-15 | 6.39E-15 | 9.69E-15 | 1.25E-14 |
| 0.562           | 5.32E-15 | 7.74E-15 | 1.13E-14 | 1.43E-14 |
| 1               | 6.45E-15 | 9.07E-15 | 1.29E-14 | 1.60E-14 |
| 1.78            | 7.57E-15 | 1.03E-14 | 1.42E-14 | 1.73E-14 |
| 3.16            | 8.58E-15 | 1.13E-14 | 1.52E-14 | 1.83E-14 |
| 5.62            | 9.45E-15 | 1.22E-14 | 1.60E-14 | 1.91E-14 |
| 10              | 1.01E-14 | 1.28E-14 | 1.65E-14 | 1.96E-14 |
| 31.6            | 1.10E-14 | 1.35E-14 | 1.71E-14 | 2.01E-14 |
| 50              | 1.12E-14 | 1.37E-14 | 1.72E-14 | 2.02E-14 |
| 100             | 1.13E-14 | 1.38E-14 | 1.73E-14 | 2.03E-14 |
| 1000            | 1.15E-14 | 1.39E-14 | 1.74E-14 | 2.03E-14 |
| $p(\text{bar})$ | 270 K    | 250 K    | 230 K    | 190 K    |
| 0.0316          | 1.23E-14 | 2.32E-14 | 4.60E-14 | 2.39E-13 |
| 0.1             | 1.80E-14 | 3.14E-14 | 5.76E-14 | 2.62E-13 |
| 0.178           | 2.08E-14 | 3.50E-14 | 6.22E-14 | 2.70E-13 |
| 0.316           | 2.34E-14 | 3.81E-14 | 6.58E-14 | 2.74E-13 |
| 0.562           | 2.56E-14 | 4.06E-14 | 6.85E-14 | 2.78E-13 |
| 1               | 2.74E-14 | 4.24E-14 | 7.04E-14 | 2.79E-13 |
| 1.78            | 2.87E-14 | 4.37E-14 | 7.16E-14 | 2.81E-13 |
| 3.16            | 2.97E-14 | 4.46E-14 | 7.24E-14 | 2.81E-13 |
| 5.62            | 3.03E-14 | 4.51E-14 | 7.28E-14 | 2.82E-13 |
| 10              | 3.07E-14 | 4.54E-14 | 7.31E-14 | 2.82E-13 |
| 31.6            | 3.11E-14 | 4.57E-14 | 7.34E-14 | 2.82E-13 |
| 50              | 3.11E-14 | 4.58E-14 | 7.34E-14 | 2.82E-13 |
| 100             | 3.12E-14 | 4.58E-14 | 7.34E-14 | 2.82E-13 |
| 1000            | 3.12E-14 | 4.59E-14 | 7.35E-14 | 2.82E-13 |

<sup>a</sup>The standard scale factor is used from the standard method.

**Table S21.** NO<sub>3</sub> concentrations (molecules/cc), the rate coefficients (cm<sup>3</sup> molecule<sup>-1</sup> s<sup>-1</sup>), and the atmospheric lifetimes (s) with respect to bimolecular reaction as functions of altitude

| $H^a$<br>(km) | $T^a$<br>(K) | $P^a$<br>(mbar) | $[NO_3]_a$        | $k_{NO_3b}^{\cdot}$    | $k_{NO_3b}^{\cdot\cdot}$ | $k_{NO_3b}^{\cdot\cdot\cdot}$ | $\tau_{NO_3c}^{\cdot}$ | $\tau_{NO_3c}^{\cdot\cdot}$ | $\tau_{NO_3c}^{\cdot\cdot\cdot}$ |
|---------------|--------------|-----------------|-------------------|------------------------|--------------------------|-------------------------------|------------------------|-----------------------------|----------------------------------|
| 0             | 290.2        | 1013            | $3.2 \times 10^8$ | $1.91 \times 10^{-14}$ | $1.48 \times 10^{-14}$   | $1.55 \times 10^{-14}$        | $1.64 \times 10^5$     | $2.11 \times 10^5$          | $2.02 \times 10^5$               |
| 5             | 250.5        | 495.9           | $5.7 \times 10^6$ | $5.19 \times 10^{-15}$ | $4.49 \times 10^{-15}$   | $4.03 \times 10^{-15}$        | $3.38 \times 10^7$     | $3.91 \times 10^7$          | $4.35 \times 10^7$               |
| 10            | 215.6        | 242.8           | $2.5 \times 10^5$ | $1.11 \times 10^{-15}$ | $1.09 \times 10^{-15}$   | $8.19 \times 10^{-16}$        | $3.60 \times 10^9$     | $3.67 \times 10^9$          | $4.88 \times 10^9$               |
| 15            | 198          | 118.8           | $1.5 \times 10^5$ | $4.17 \times 10^{-16}$ | $4.42 \times 10^{-16}$   | $2.96 \times 10^{-16}$        | $1.60 \times 10^{10}$  | $1.51 \times 10^{10}$       | $2.25 \times 10^{10}$            |

<sup>a</sup> $H$  denotes altitude (atmospheric scale height);  $T$  denotes temperature;  $p$  denotes pressure;  $[NO_3]$  denotes concentration.<sup>20</sup>

<sup>b</sup> $k_{NO_3}^{\cdot}$ ;  $k_{NO_3}^{\cdot\cdot}$  and  $k_{NO_3}^{\cdot\cdot\cdot}$  are from the experimental rate coefficients of the NO<sub>3</sub> reactions with RCHO (R = C<sub>5</sub>H<sub>11</sub>, C<sub>4</sub>H<sub>9</sub>, and C<sub>3</sub>H<sub>7</sub>). The preferred rate coefficients (in cm<sup>3</sup> molecule<sup>-1</sup> s<sup>-1</sup>) of the previous literature.<sup>21</sup>

<sup>c</sup> $\tau_{NO_3}^{\cdot}$ ;  $\tau_{NO_3}^{\cdot\cdot}$  and  $\tau_{NO_3}^{\cdot\cdot\cdot}$  are the atmosphere lifetimes of OH react with RCHO (R = C<sub>5</sub>H<sub>11</sub>, C<sub>4</sub>H<sub>9</sub>, and C<sub>3</sub>H<sub>7</sub>).

**Table S22.** Volatility estimation of the products from hexanal oxidation.

| Pathway                   | Formula                                       | C*(298 K) <sup>a</sup> (g/m <sup>3</sup> ) | C*(298 K) <sup>b</sup> (g/m) | Volatility bin |
|---------------------------|-----------------------------------------------|--------------------------------------------|------------------------------|----------------|
| OH oxidation              | C <sub>6</sub> H <sub>12</sub> O <sub>3</sub> | 2.29E+06                                   | 3.96E+06                     | IVOC           |
|                           | C <sub>6</sub> H <sub>12</sub> O <sub>5</sub> | 2.28E+03                                   | 1.78E+04                     | IVOC           |
|                           | C <sub>6</sub> H <sub>12</sub> O <sub>4</sub> | 1.66E+04                                   | 2.91E+04                     | IVOC           |
|                           | C <sub>6</sub> H <sub>10</sub> O <sub>4</sub> | 1.62E+05                                   | 5.07E+05                     | IVOC           |
| HO <sub>2</sub> oxidation | C <sub>6</sub> H <sub>14</sub> O <sub>3</sub> | 1.13E+04                                   | 2.57E+04                     | IVOC           |
|                           | C <sub>6</sub> H <sub>12</sub> O <sub>4</sub> | 7.99E+02                                   | 3.28E+03                     | IVOC           |
|                           | C <sub>6</sub> H <sub>14</sub> O <sub>5</sub> | 9.94E+00                                   | 1.15E+02                     | SVOC           |
|                           | C <sub>6</sub> H <sub>14</sub> O <sub>4</sub> | 7.49E+01                                   | 1.88E+02                     | SVOC           |
|                           | C <sub>6</sub> H <sub>12</sub> O <sub>4</sub> | 2.21E+02                                   | 1.33E+03                     | SVOC           |

<sup>a</sup>Estimation using EVAPORATION<sup>b</sup>estimation using SIMPOL1



**Table S23.** The Cartesian coordinates (Å) of the optimized geometries by M06-2X /MG3S

|                                  |             |             |             |             |
|----------------------------------|-------------|-------------|-------------|-------------|
| HO <sub>2</sub>                  | H           | -0.87923900 | -0.86675500 | 0.00000000  |
|                                  | O           | 0.05495200  | -0.59862600 | 0.00000000  |
|                                  | O           | 0.05495200  | 0.70697000  | 0.00000000  |
| C <sub>4</sub> H <sub>8</sub> O  | C           | -1.01135400 | 0.40855500  | -0.52911500 |
|                                  | H           | -1.73263600 | 1.19241500  | -0.76296000 |
|                                  | H           | -0.69610300 | -0.03078000 | -1.47622100 |
|                                  | C           | 0.19963900  | 1.03687500  | 0.14582500  |
|                                  | H           | 0.54240500  | 1.93256700  | -0.38394700 |
|                                  | H           | -0.03479900 | 1.37509600  | 1.16093200  |
|                                  | C           | 1.39461800  | 0.12580300  | 0.23543700  |
|                                  | H           | 2.25630000  | 0.52971600  | 0.80192500  |
|                                  | O           | 1.46293000  | -0.95991900 | -0.27029800 |
|                                  | C           | -1.67006400 | -0.65936300 | 0.33839400  |
|                                  | H           | -2.53510700 | -1.09215500 | -0.16190300 |
|                                  | H           | -0.97058000 | -1.46464000 | 0.55707800  |
|                                  | H           | -2.00994900 | -0.23408300 | 1.28423400  |
| C <sub>5</sub> H <sub>10</sub> O | C           | -1.21829900 | -0.06267300 | 0.50915800  |
|                                  | H           | -0.70093600 | -0.97807500 | 0.80005300  |
|                                  | H           | -1.34470200 | 0.53381600  | 1.41708400  |
|                                  | C           | -0.34943700 | 0.71113300  | -0.47842800 |
|                                  | H           | -0.85629200 | 1.63762600  | -0.75663200 |
|                                  | H           | -0.23231700 | 0.12394200  | -1.39163700 |
|                                  | C           | 1.02829300  | 1.03971900  | 0.07688300  |
|                                  | H           | 1.55342100  | 1.77490900  | -0.54276800 |
|                                  | H           | 0.96523000  | 1.49536600  | 1.07095200  |
|                                  | C           | 1.94785300  | -0.14781900 | 0.17960900  |
|                                  | H           | 2.92637200  | 0.05180700  | 0.65832200  |
|                                  | O           | 1.69163900  | -1.24586700 | -0.23009100 |
|                                  | C           | -2.58297400 | -0.40589200 | -0.07493200 |
|                                  | H           | -3.20003800 | -0.94730500 | 0.64092800  |
|                                  | H           | -3.12121600 | 0.49745700  | -0.36619900 |
| H                                | -2.47525000 | -1.02941000 | -0.96311400 |             |
| C <sub>6</sub> H <sub>12</sub> O | C           | 3.14059400  | 0.55855800  | 0.30642400  |
|                                  | H           | 3.31813000  | 0.11219100  | 1.28595500  |
|                                  | H           | 2.85697800  | 1.59984800  | 0.46411400  |
|                                  | H           | 4.08179500  | 0.54701600  | -0.24194100 |
|                                  | C           | 2.04494000  | -0.19191700 | -0.44111800 |
|                                  | H           | 1.89917500  | 0.25455700  | -1.42780100 |
|                                  | H           | 2.35632800  | -1.22585500 | -0.61322600 |
|                                  | C           | 0.71718600  | -0.18411800 | 0.30708000  |
|                                  | H           | 0.39720500  | 0.84870300  | 0.46310300  |
|                                  | H           | 0.85988900  | -0.62483600 | 1.29950300  |
|                                  | C           | -0.37916000 | -0.94721000 | -0.42984200 |
|                                  | H           | -0.06869400 | -1.98512200 | -0.56673600 |
|                                  | H           | -0.51056700 | -0.51820200 | -1.42528800 |
|                                  | C           | -1.71397200 | -0.91557700 | 0.29969400  |
|                                  | H           | -2.42360400 | -1.63911000 | -0.11653300 |

|     |             |             |             |             |
|-----|-------------|-------------|-------------|-------------|
|     | H           | -1.60558400 | -1.19379000 | 1.35349800  |
|     | C           | -2.40806200 | 0.41944800  | 0.25169400  |
|     | H           | -3.33970200 | 0.48971700  | 0.84638600  |
|     | O           | -2.02881200 | 1.36247300  | -0.38557900 |
| C1C | C           | -1.98464200 | 0.27028700  | -0.14054800 |
|     | H           | -2.14086800 | -0.14288900 | -1.13790100 |
|     | H           | -2.97120500 | 0.45273900  | 0.28671800  |
|     | C           | -1.26986600 | -0.76420900 | 0.71741100  |
|     | H           | -0.99007200 | -0.35701600 | 1.69433300  |
|     | H           | -1.91065900 | -1.62697700 | 0.93319600  |
|     | C           | -0.02160400 | -1.32327800 | 0.10913600  |
|     | H           | 0.56838400  | -1.99168800 | 0.75900800  |
|     | O           | 0.33940800  | -1.11519000 | -1.02700200 |
|     | H           | 1.79724400  | -0.07057900 | -0.85848600 |
|     | O           | 2.33306500  | 0.54010900  | -0.29786000 |
|     | O           | 1.78398400  | 0.49712400  | 0.87878500  |
|     | C           | -1.21525700 | 1.58378200  | -0.23914100 |
|     | H           | -0.25828600 | 1.44265200  | -0.73772500 |
| H   | -1.78080700 | 2.32360300  | -0.80368300 |             |
| H   | -1.01717200 | 1.99432100  | 0.75200000  |             |
| C1B | C           | -1.42951600 | 0.63649500  | -0.76973500 |
|     | H           | -0.41444600 | 0.75241400  | -1.15136700 |
|     | H           | -2.09601200 | 0.84355000  | -1.60880800 |
|     | C           | -1.65259900 | -0.81335000 | -0.33535600 |
|     | H           | -1.51728600 | -1.47322400 | -1.19336700 |
|     | H           | -2.68599200 | -0.93015700 | -0.00175100 |
|     | C           | -0.72984000 | -1.27697700 | 0.78429400  |
|     | H           | -0.75689700 | -0.61219300 | 1.65192100  |
|     | H           | -1.03252500 | -2.25823300 | 1.16831800  |
|     | C           | 0.70621900  | -1.42263100 | 0.38818800  |
|     | H           | 1.40781200  | -1.64693300 | 1.20973800  |
|     | O           | 1.11538100  | -1.34762300 | -0.74836800 |
|     | H           | 2.01188900  | 0.21016800  | -0.81793700 |
|     | O           | 2.19794700  | 1.09268700  | -0.41628300 |
|     | O           | 1.57127100  | 1.09054100  | 0.72147900  |
|     | C           | -1.68448800 | 1.65426000  | 0.33738600  |
| H   | -1.61430500 | 2.67100500  | -0.04668800 |             |
| H   | -2.68144600 | 1.52514500  | 0.76344300  |             |
| H   | -0.95624400 | 1.56683200  | 1.14321400  |             |
| C1A | C           | -2.90532500 | 0.60333500  | -0.03542000 |
|     | H           | -3.49950200 | 0.25230500  | -0.88045100 |
|     | H           | -2.37861100 | 1.50628100  | -0.34762000 |
|     | H           | -3.58938200 | 0.87595600  | 0.76717100  |
|     | C           | -1.91015300 | -0.46098200 | 0.41180300  |
|     | H           | -1.33896200 | -0.07083100 | 1.25605100  |
|     | H           | -2.44213100 | -1.34587300 | 0.77323300  |
|     | C           | -0.96934300 | -0.86503900 | -0.71894000 |
|     | H           | -0.47166700 | 0.02432200  | -1.10948700 |
|     | H           | -1.56553600 | -1.26270800 | -1.54419100 |

|     |             |             |             |             |
|-----|-------------|-------------|-------------|-------------|
|     | C           | 0.07678400  | -1.91162900 | -0.33296700 |
|     | H           | 0.65253800  | -2.18799300 | -1.21737000 |
|     | H           | -0.42839500 | -2.81578600 | 0.01354800  |
|     | C           | 1.04401200  | -1.45540200 | 0.75266500  |
|     | H           | 0.53141600  | -1.12856000 | 1.66095000  |
|     | H           | 1.69441800  | -2.27755400 | 1.07425300  |
|     | C           | 1.96505500  | -0.34734400 | 0.34717800  |
|     | H           | 2.57610500  | 0.08549200  | 1.15789600  |
|     | O           | 2.09665700  | 0.05758600  | -0.78556000 |
|     | H           | 1.30254400  | 1.67663100  | -0.80979900 |
|     | O           | 0.68293700  | 2.31818000  | -0.38670600 |
|     | O           | 0.36427800  | 1.78556900  | 0.75475300  |
| M1C | C           | -1.75435300 | 0.20776600  | 0.38015700  |
|     | H           | -1.69735200 | 0.07826300  | 1.46351600  |
|     | H           | -1.84647100 | 1.28063900  | 0.20305600  |
|     | C           | -0.46460100 | -0.30560600 | -0.25057200 |
|     | H           | -0.34184000 | -1.37185800 | -0.05541400 |
|     | H           | -0.49078400 | -0.17888700 | -1.33881400 |
|     | C           | 0.75630900  | 0.41106400  | 0.28007400  |
|     | H           | 0.86520800  | 0.30811000  | 1.35903300  |
|     | O           | 0.81598900  | 1.74853800  | -0.02737200 |
|     | H           | 0.57078200  | 1.88103000  | -0.94817900 |
|     | O           | 1.95399800  | -0.19814100 | -0.30391600 |
|     | O           | 2.16306400  | -1.38102000 | 0.17524700  |
|     | C           | -2.97898600 | -0.51857900 | -0.16301300 |
|     | H           | -2.91437300 | -1.58949700 | 0.03162900  |
| H   | -3.89456700 | -0.14834200 | 0.29532800  |             |
| H   | -3.06522300 | -0.38234600 | -1.24171400 |             |
| M1B | C           | 2.59581600  | -0.43430800 | -0.18256500 |
|     | H           | 3.33713100  | -1.07549900 | 0.29701400  |
|     | H           | 2.59505500  | -0.70441900 | -1.24193500 |
|     | C           | 1.22445200  | -0.74518900 | 0.41484800  |
|     | H           | 1.23828700  | -0.52490200 | 1.48641900  |
|     | H           | 1.01967300  | -1.81320000 | 0.32044800  |
|     | C           | 0.09353500  | 0.04400400  | -0.23798000 |
|     | H           | 0.19819300  | 1.11174100  | -0.04739500 |
|     | H           | 0.10529000  | -0.09413800 | -1.32570300 |
|     | C           | -1.26230800 | -0.38255200 | 0.27810100  |
|     | H           | -1.35439900 | -0.26338500 | 1.35699900  |
|     | O           | -1.62123600 | -1.66998800 | -0.03931600 |
|     | H           | -1.40642600 | -1.84885400 | -0.95988300 |
|     | O           | -2.28712000 | 0.48414400  | -0.31028500 |
|     | O           | -2.22701400 | 1.68209000  | 0.17299100  |
|     | C           | 3.01258900  | 1.02469600  | -0.02619700 |
| H   | 4.03213200  | 1.18045300  | -0.37584600 |             |
| H   | 2.36611500  | 1.69244500  | -0.59516100 |             |
| H   | 2.96740800  | 1.32988900  | 1.02067900  |             |

|      |             |             |             |             |
|------|-------------|-------------|-------------|-------------|
| M1A  | C           | 2.91698200  | 1.16206700  | 0.65472700  |
|      | H           | 3.48990900  | 0.60544000  | 1.39862700  |
|      | H           | 1.96249700  | 1.43290800  | 1.10762900  |
|      | H           | 3.45162800  | 2.08690300  | 0.44325100  |
|      | C           | 2.72504200  | 0.33445900  | -0.61212100 |
|      | H           | 2.10542200  | 0.88825000  | -1.32130200 |
|      | H           | 3.68944900  | 0.19398700  | -1.10314300 |
|      | C           | 2.11181200  | -1.04179100 | -0.34891400 |
|      | H           | 2.81556900  | -1.63725900 | 0.23787400  |
|      | H           | 1.98305200  | -1.56388900 | -1.30073200 |
|      | C           | 0.77138200  | -1.01168300 | 0.38607100  |
|      | H           | 0.90932800  | -0.62246600 | 1.39799800  |
|      | H           | 0.40301500  | -2.03261700 | 0.50071100  |
|      | C           | -0.28071800 | -0.17059900 | -0.32983500 |
|      | H           | 0.00343600  | 0.88198000  | -0.34610500 |
|      | H           | -0.38855200 | -0.49140200 | -1.37280600 |
|      | C           | -1.63271600 | -0.27062900 | 0.33955200  |
|      | H           | -1.60549200 | 0.04161600  | 1.38291300  |
|      | O           | -2.21346800 | -1.51415600 | 0.28306000  |
| H    | -2.11168000 | -1.87964800 | -0.60102900 |             |
| O    | -2.56160100 | 0.64518500  | -0.32868600 |             |
| O    | -2.27221700 | 1.87962700  | -0.07446900 |             |
| TS2B | C           | 0.59329600  | 1.26856600  | -0.25614800 |
|      | H           | 1.04772700  | 2.23994900  | -0.06637800 |
|      | H           | 0.64891500  | 1.09848700  | -1.33386400 |
|      | O           | 0.71243100  | -0.97076000 | 0.70255900  |
|      | O           | 0.22723800  | -1.44457400 | -0.50133000 |
|      | C           | -0.87108700 | 1.23755100  | 0.19759100  |
|      | H           | -1.33742200 | 2.20848200  | 0.00569600  |
|      | H           | -0.91832400 | 1.07638500  | 1.27715100  |
|      | C           | -1.66796800 | 0.16427400  | -0.51092400 |
|      | H           | -0.79382500 | -0.80988600 | -0.62042800 |
|      | H           | -1.84433700 | 0.38905400  | -1.56360300 |
|      | C           | -2.84927800 | -0.40603400 | 0.22129700  |
|      | H           | -3.58304400 | 0.37942500  | 0.43165600  |
|      | H           | -2.53725500 | -0.82599300 | 1.17844800  |
|      | O           | 2.63793400  | -0.03727300 | -0.20304300 |
|      | H           | 2.42332700  | -0.41327600 | -1.06320800 |
|      | C           | 1.44736400  | 0.22120300  | 0.45775500  |
| H    | 1.70759300  | 0.54893100  | 1.46479600  |             |
| H    | -3.34813800 | -1.18406100 | -0.35318400 |             |
| TS2A | C           | 1.70170000  | 0.07030400  | 0.34615300  |
|      | C           | 1.02482000  | 1.07905600  | -0.57078500 |
|      | H           | 1.80091900  | 1.78035600  | -0.87810200 |
|      | H           | 0.70468800  | 0.55838300  | -1.47585400 |
|      | O           | 0.78780200  | -0.89286300 | 0.85971900  |
|      | O           | 0.20029700  | -1.56316400 | -0.19373600 |
|      | C           | -0.14220500 | 1.85246100  | 0.04696400  |
|      | H           | -0.48993600 | 2.57029500  | -0.69904300 |

|     |             |             |             |             |
|-----|-------------|-------------|-------------|-------------|
|     | H           | 0.22021700  | 2.44285800  | 0.89147900  |
|     | C           | -1.33395100 | 1.00567100  | 0.50974600  |
|     | H           | -2.17974300 | 1.67245700  | 0.71905900  |
|     | H           | -1.10432000 | 0.51240700  | 1.45697800  |
|     | C           | -1.77859600 | -0.03935700 | -0.47746400 |
|     | H           | -0.77656900 | -0.90377300 | -0.43948300 |
|     | H           | -1.75808200 | 0.28628100  | -1.51893200 |
|     | C           | -2.99407900 | -0.84085700 | -0.09839600 |
|     | H           | -3.88279400 | -0.20192600 | -0.08151000 |
|     | H           | -3.18123400 | -1.65136400 | -0.80068200 |
|     | H           | -2.87724300 | -1.26905300 | 0.89755500  |
|     | O           | 2.77927300  | -0.54955000 | -0.27201900 |
|     | H           | 2.43738500  | -1.06328900 | -1.01135100 |
|     | H           | 2.08160700  | 0.54731600  | 1.25086300  |
| M2B | C           | 0.01197900  | -1.28492800 | 0.36319700  |
|     | H           | -0.13837600 | -2.11039100 | -0.33481200 |
|     | H           | 0.49640300  | -1.68996900 | 1.25615700  |
|     | O           | 1.25158200  | 0.67231600  | 0.67085300  |
|     | O           | 1.95501200  | 1.72103200  | 0.03482800  |
|     | C           | -1.32880800 | -0.64823100 | 0.72860300  |
|     | H           | -1.16015500 | 0.18683600  | 1.41256000  |
|     | H           | -1.91720500 | -1.38529800 | 1.29315400  |
|     | C           | -2.09513200 | -0.17896800 | -0.45928900 |
|     | H           | 2.80999600  | 1.31088900  | -0.15431600 |
|     | H           | -2.07296300 | -0.79160700 | -1.35278600 |
|     | C           | -3.15580200 | 0.85220000  | -0.31771900 |
|     | H           | -2.79181200 | 1.71104900  | 0.25089800  |
|     | H           | -4.02773500 | 0.46597100  | 0.22683500  |
|     | O           | 2.15496200  | -0.91352600 | -0.73353200 |
|     | H           | 2.47884700  | -1.49668900 | -0.04001000 |
| C   | 0.96871300  | -0.30961600 | -0.29456800 |             |
| H   | 0.53495700  | 0.17151400  | -1.17209800 |             |
| H   | -3.51011200 | 1.20637300  | -1.28411600 |             |
| M2A | C           | 1.61207700  | -0.26726100 | -0.28056600 |
|     | O           | 1.32522100  | 0.87298400  | 0.49091700  |
|     | O           | 1.89919500  | 1.99329500  | -0.15473900 |
|     | H           | 2.84553500  | 1.84427100  | -0.02330500 |
|     | H           | 1.24234800  | -2.32831300 | -0.02007300 |
|     | H           | 0.81738600  | -1.34065200 | 1.37753200  |
|     | C           | 0.76766300  | -1.39520600 | 0.28535100  |
|     | C           | -0.68645700 | -1.38977100 | -0.18249500 |
|     | H           | -1.17940900 | -2.27173500 | 0.23273700  |
|     | H           | -0.71542400 | -1.50749400 | -1.26887900 |
|     | C           | -1.48996800 | -0.15034400 | 0.20818500  |
|     | H           | -1.07777000 | 0.73901400  | -0.27712300 |
|     | H           | -1.35382500 | 0.03661800  | 1.28507400  |
|     | C           | -2.93493400 | -0.27634400 | -0.12101800 |
|     | H           | -3.37735600 | -1.26469200 | -0.13568000 |
|     | C           | -3.82419500 | 0.91398100  | -0.07844400 |

|      |             |             |             |             |
|------|-------------|-------------|-------------|-------------|
|      | H           | -4.80426400 | 0.70720200  | -0.50494800 |
|      | H           | -3.98355600 | 1.26434100  | 0.95001700  |
|      | H           | -3.38303200 | 1.75333800  | -0.62180500 |
|      | O           | 2.98974100  | -0.52882800 | -0.24541700 |
|      | H           | 3.21172900  | -0.88482300 | 0.62069900  |
|      | H           | 1.37926800  | -0.05701300 | -1.32641300 |
| C3A  | C           | 2.12816300  | -0.41368200 | -0.19591900 |
|      | O           | 2.06475200  | 0.92593400  | 0.23067700  |
|      | O           | 2.67368800  | 1.73107700  | -0.76010500 |
|      | H           | 3.60736300  | 1.49452800  | -0.67339300 |
|      | H           | 1.55211300  | -2.24586800 | 0.68095800  |
|      | H           | 1.43111900  | -0.86103700 | 1.76533800  |
|      | C           | 1.23586900  | -1.20442100 | 0.74441800  |
|      | C           | -0.25563400 | -1.11313500 | 0.42324200  |
|      | H           | -0.79858500 | -1.75117400 | 1.12346500  |
|      | H           | -0.43388500 | -1.53712900 | -0.56679800 |
|      | C           | -0.82691800 | 0.30113900  | 0.48535500  |
|      | H           | -0.41362300 | 0.92156200  | -0.31175000 |
|      | H           | -0.53386700 | 0.77907300  | 1.42402200  |
|      | C           | -2.34356100 | 0.34688700  | 0.40183700  |
|      | H           | -2.79669200 | -0.27886000 | 1.17170100  |
|      | C           | -2.89766200 | 1.75465800  | 0.42241700  |
|      | H           | -3.98304300 | 1.74611500  | 0.34531600  |
|      | H           | -2.61570800 | 2.24615000  | 1.35220000  |
|      | H           | -2.49093900 | 2.33236800  | -0.40711300 |
|      | O           | 3.46059100  | -0.84744200 | -0.20027100 |
| H    | 3.74522600  | -0.97777300 | 0.70977900  |             |
| H    | 1.79530400  | -0.47265600 | -1.23412900 |             |
| O    | -2.76311600 | -0.23094600 | -0.86588800 |             |
| O    | -2.97420500 | -1.50662100 | -0.78787300 |             |
| TS3A | C           | -1.58473400 | 0.27622300  | -0.24101200 |
|      | O           | -1.47954100 | -0.81873500 | 0.67545600  |
|      | O           | -1.41530900 | -1.97442500 | -0.02135600 |
|      | H           | -0.23260900 | -2.16043100 | -0.02032200 |
|      | H           | -1.98747200 | 2.23741300  | 0.43639200  |
|      | H           | -1.02190800 | 1.28402300  | 1.55307100  |
|      | C           | -1.15865800 | 1.53402400  | 0.49973900  |
|      | C           | 0.10676100  | 2.18742500  | -0.06107500 |
|      | H           | 0.15694700  | 3.20448800  | 0.32995500  |
|      | H           | 0.00715100  | 2.28748100  | -1.14591100 |
|      | C           | 1.44175600  | 1.51161000  | 0.26329800  |
|      | H           | 1.57291200  | 1.43470400  | 1.34643300  |
|      | H           | 2.24344100  | 2.15861600  | -0.09710200 |
|      | C           | 1.68228600  | 0.12656900  | -0.32505600 |

|      |             |             |             |             |
|------|-------------|-------------|-------------|-------------|
|      | H           | 1.18848800  | 0.00573700  | -1.29262600 |
|      | C           | 3.15575000  | -0.21612400 | -0.45185300 |
|      | H           | 3.27385500  | -1.25335200 | -0.75817200 |
|      | H           | 3.62531900  | 0.42676700  | -1.19537900 |
|      | H           | 3.65657600  | -0.06942300 | 0.50532500  |
|      | O           | -2.89198900 | 0.40287600  | -0.68618100 |
|      | H           | -3.13280800 | -0.40240800 | -1.15550600 |
|      | H           | -0.92123500 | 0.02853900  | -1.07384200 |
|      | O           | 1.07254500  | -0.80645400 | 0.58737900  |
|      | O           | 0.92834100  | -2.01582600 | 0.00263200  |
| M3A  | C           | -1.80129600 | 0.04544100  | 0.53112000  |
|      | O           | -2.93284800 | -0.66670900 | -0.08573000 |
|      | O           | -3.84050700 | 0.15514500  | -0.49906700 |
|      | H           | 1.73630800  | -2.40426500 | -0.52961300 |
|      | H           | -0.59712500 | -0.03636200 | -1.22404500 |
|      | H           | -1.74593200 | 1.29380100  | -1.16134200 |
|      | C           | -1.02219100 | 0.72926000  | -0.57319300 |
|      | C           | 0.05471000  | 1.69102000  | -0.06001600 |
|      | H           | -0.41660500 | 2.38519800  | 0.64007600  |
|      | H           | 0.39264000  | 2.29880800  | -0.90297700 |
|      | C           | 1.28375400  | 1.07922300  | 0.62043100  |
|      | H           | 0.99233200  | 0.36548600  | 1.39173500  |
|      | H           | 1.82527000  | 1.87756900  | 1.13295600  |
|      | C           | 2.28325000  | 0.42430300  | -0.32437000 |
|      | H           | 2.55279500  | 1.13292300  | -1.11333900 |
|      | C           | 3.53369000  | -0.06025600 | 0.38654400  |
|      | H           | 4.20122100  | -0.56082300 | -0.31388900 |
|      | H           | 4.06494600  | 0.78348900  | 0.82471000  |
|      | H           | 3.27549800  | -0.75075200 | 1.18828100  |
|      | O           | -1.10960900 | -0.89139100 | 1.24914600  |
| H    | -0.45488600 | -1.32061900 | 0.68233400  |             |
| H    | -2.25716700 | 0.75585700  | 1.22153800  |             |
| O    | 1.69554100  | -0.61968700 | -1.10715700 |             |
| O    | 1.24232400  | -1.63663900 | -0.22213300 |             |
| TS4A | C           | 1.94781200  | -0.32697900 | 0.21695600  |
|      | O           | 0.95111100  | -1.21180100 | 0.78226100  |
|      | O           | 0.18414900  | -0.63247300 | 1.76263500  |
|      | H           | -0.50040100 | -2.09543200 | -0.30614800 |
|      | H           | 1.44990900  | 1.38551600  | 1.41450400  |
|      | H           | 2.63102900  | 1.62826700  | 0.14656400  |
|      | C           | 1.66705800  | 1.16843800  | 0.36923500  |
|      | C           | 0.62817500  | 1.81483900  | -0.55684700 |
|      | H           | 0.73473900  | 1.42103000  | -1.56855300 |
|      | H           | 0.87928300  | 2.87319800  | -0.63281400 |
|      | C           | -0.83578100 | 1.73449100  | -0.12035900 |
|      | H           | -1.45657400 | 2.25261900  | -0.85965600 |
|      | H           | -0.97346500 | 2.26078800  | 0.82679500  |
|      | C           | -1.37245600 | 0.33690200  | 0.06346600  |
|      | H           | -0.70463700 | -0.12894100 | 1.08781500  |

|    |   |             |             |             |
|----|---|-------------|-------------|-------------|
|    | C | -2.83350800 | 0.19919000  | 0.39750200  |
|    | H | -3.09536900 | -0.83588500 | 0.59704900  |
|    | H | -3.06676200 | 0.80181000  | 1.27358200  |
|    | H | -3.43510300 | 0.55662000  | -0.44262800 |
|    | O | 2.09520600  | -0.74609500 | -1.09136500 |
|    | H | 1.24926500  | -0.62119100 | -1.53967700 |
|    | H | 2.88676100  | -0.55861800 | 0.72169700  |
|    | O | -0.93302800 | -0.43128100 | -1.00801600 |
|    | O | -1.27324800 | -1.79098300 | -0.81279500 |
|    | C | -1.86864600 | -0.52036200 | 0.15414900  |
|    | O | -1.53334500 | 0.60860700  | 0.93788100  |
|    | O | -1.30440700 | 1.69381400  | 0.05224900  |
|    | H | -1.09911800 | -1.82279300 | -1.31415600 |
|    | H | -0.35358200 | -0.23930600 | -1.34069000 |
|    | C | -0.69726500 | -1.03531100 | -0.67629800 |
|    | C | 0.45359700  | -1.61374800 | 0.14827100  |
|    | H | 1.12130500  | -2.16425500 | -0.51824500 |
|    | H | 0.05624400  | -2.34857700 | 0.85163900  |
|    | C | 1.28398200  | -0.59416300 | 0.95563100  |
| P  | H | 2.02857600  | -1.13365200 | 1.54196200  |
|    | H | 0.63687100  | -0.03181200 | 1.62511900  |
|    | C | 1.97480500  | 0.37027000  | 0.02623400  |
|    | H | -0.33046900 | 1.70071700  | -0.02692200 |
|    | C | 3.35028800  | 0.00278800  | -0.45772400 |
|    | H | 3.66589600  | 0.67040300  | -1.25329400 |
|    | H | 4.04640400  | 0.07404700  | 0.38036900  |
|    | H | 3.36747500  | -1.03364400 | -0.79713400 |
|    | O | -2.98880700 | -0.27051800 | -0.62868400 |
|    | H | -2.82254300 | 0.55219200  | -1.10253800 |
|    | H | -2.15587600 | -1.26023300 | 0.90558900  |
|    | O | 1.43384100  | 1.39060600  | -0.34310600 |
| OH | H | 0.00000000  | 0.00000000  | -0.86302900 |
|    | O | 0.00000000  | 0.00000000  | 0.10787900  |



**Table S24.** Absolute energies in hartrees

| Species                          | Methods                  | Total energies (a.u.) |
|----------------------------------|--------------------------|-----------------------|
| HO <sub>2</sub>                  | CCSD(T)-F12a/cc-pVTZ-F12 | -150.78477083         |
|                                  | CCSD(T)-F12a/cc-pVDZ-F12 | -150.76418048         |
|                                  | M06-2X /MG3S             | 150.900055            |
|                                  | M11-L/MG3S               | -150.90327500         |
| C <sub>4</sub> H <sub>8</sub> O  | CCSD(T)-F12a/cc-pVTZ-F12 | -232.17432822         |
|                                  | CCSD(T)-F12a/cc-pVDZ-F12 | -232.14694116         |
|                                  | M06-2X /MG3S             | 232.425625            |
|                                  | M11-L/MG3S               | -232.48220800         |
| C <sub>3</sub> H <sub>10</sub> O | CCSD(T)-F12a/cc-pVTZ-F12 | -271.43229796         |
|                                  | CCSD(T)-F12a/cc-pVDZ-F12 | -271.40054289         |
|                                  | M06-2X /MG3S             | 271.73146             |
|                                  | M11-L/MG3S               | -271.80124100         |
| C <sub>6</sub> H <sub>12</sub> O | CCSD(T)-F12a/cc-pVTZ-F12 | -310.69014362         |
|                                  | CCSD(T)-F12a/cc-pVDZ-F12 | -310.65401591         |
|                                  | M06-2X /MG3S             | -311.03714400         |
|                                  | M11-L/MG3S               | -311.12010900         |
| C1C                              | CCSD(T)-F12a/cc-pVTZ-F12 | -382.97325135         |
|                                  | CCSD(T)-F12a/cc-pVDZ-F12 | -382.92514161         |
|                                  | M06-2X /MG3S             | -383.34276500         |
|                                  | M11-L/MG3S               | -383.39956700         |
| C1B                              | CCSD(T)-F12a/cc-pVTZ-F12 | -422.23071584         |
|                                  | CCSD(T)-F12a/cc-pVDZ-F12 | -422.17824229         |
|                                  | M06-2X /MG3S             | -422.64868000         |
|                                  | M11-L/MG3S               | -422.71800000         |
| C1A                              | CCSD(T)-F12a/cc-pVTZ-F12 | -461.48880852         |
|                                  | CCSD(T)-F12a/cc-pVDZ-F12 | -461.43197836         |
|                                  | M06-2X /MG3S             | -461.95510000         |
|                                  | M11-L/MG3S               | -462.03716100         |
| TS1C                             | CCSD(T)-F12a/cc-pVTZ-F12 | -382.96281130         |
|                                  | CCSD(T)-F12a/cc-pVDZ-F12 | -382.91471564         |
|                                  | M06-2X /MG3S             | -383.33195700         |
|                                  | M11-L/MG3S               | -383.38767500         |
| TS1B                             | CCSD(T)-F12a/cc-pVTZ-F12 | -422.22071804         |
|                                  | CCSD(T)-F12a/cc-pVDZ-F12 | -422.16825712         |
|                                  | M06-2X /MG3S             | -422.63773300         |

|      |                          |               |
|------|--------------------------|---------------|
|      | M11-L/MG3S               | -422.70667400 |
| TS1A | CCSD(T)-F12a/cc-pVTZ-F12 | -461.47855466 |
|      | CCSD(T)-F12a/cc-pVDZ-F12 | -461.42172361 |
|      | M06-2X /MG3S             | -461.94344400 |
|      | M11-L/MG3S               | -462.02557800 |
| M1C  | CCSD(T)-F12a/cc-pVTZ-F12 | -382.98427872 |
|      | CCSD(T)-F12a/cc-pVDZ-F12 | -382.93604158 |
|      | M06-2X /MG3S             | -383.35517900 |
|      | M11-L/MG3S               | -383.40595900 |
| M1B  | CCSD(T)-F12a/cc-pVTZ-F12 | -422.24132412 |
|      | CCSD(T)-F12a/cc-pVDZ-F12 | -422.18872183 |
|      | M06-2X /MG3S             | -422.66031300 |
|      | M11-L/MG3S               | -422.72395800 |
| M1A  | CCSD(T)-F12a/cc-pVTZ-F12 | -461.49776390 |
|      | CCSD(T)-F12a/cc-pVDZ-F12 | -461.44175597 |
|      | M06-2X /MG3S             | -461.96602600 |
|      | M11-L/MG3S               | -462.04216200 |
| TS2B | CCSD(T)-F12a/cc-pVTZ-F12 | -422.20485011 |
|      | CCSD(T)-F12a/cc-pVDZ-F12 | -422.15198348 |
|      | M06-2X /MG3S             | -422.62374300 |
|      | M11-L/MG3S               | -422.69264900 |
| TS2A | CCSD(T)-F12a/cc-pVTZ-F12 | -461.46458422 |
|      | CCSD(T)-F12a/cc-pVDZ-F12 | -461.40733252 |
|      | M06-2X /MG3S             | -461.93244200 |
|      | M11-L/MG3S               | -462.01315900 |
| M2B  | CCSD(T)-F12a/cc-pVTZ-F12 | -422.22428420 |
|      | CCSD(T)-F12a/cc-pVDZ-F12 | -422.17140789 |
|      | M06-2X /MG3S             | -422.64330000 |
|      | M11-L/MG3S               | -422.71178800 |
| M2A  | CCSD(T)-F12a/cc-pVTZ-F12 | -461.48029127 |
|      | CCSD(T)-F12a/cc-pVDZ-F12 | -461.42304068 |
|      | M06-2X /MG3S             | -461.94702400 |
|      | M11-L/MG3S               | -462.02884100 |
| C3A  | CCSD(T)-F12a/cc-pVDZ-F12 | -611.66312653 |
|      | M06-2X /MG3S             | -612.32775100 |
| TS3A | CCSD(T)-F12a/cc-pVDZ-F12 | -611.63268729 |
|      | M06-2X /MG3S             | -612.29906800 |

---

|      |                          |               |
|------|--------------------------|---------------|
| M3A  | CCSD(T)-F12a/cc-pVDZ-F12 | -611.66202340 |
|      | M06-2X /MG3S             | -612.32740400 |
| TS4A | CCSD(T)-F12a/cc-pVDZ-F12 | -611.62775038 |
|      | M06-2X /MG3S             | -612.29441600 |
| M4A  | CCSD(T)-F12a/cc-pVDZ-F12 | -536.04674838 |
|      | M06-2X /MG3S             | -536.64187700 |
| OH   | CCSD(T)-F12a/cc-pVDZ-F12 | -75.66379802  |
|      | M06-2X /MG3S             | -75.72913400  |

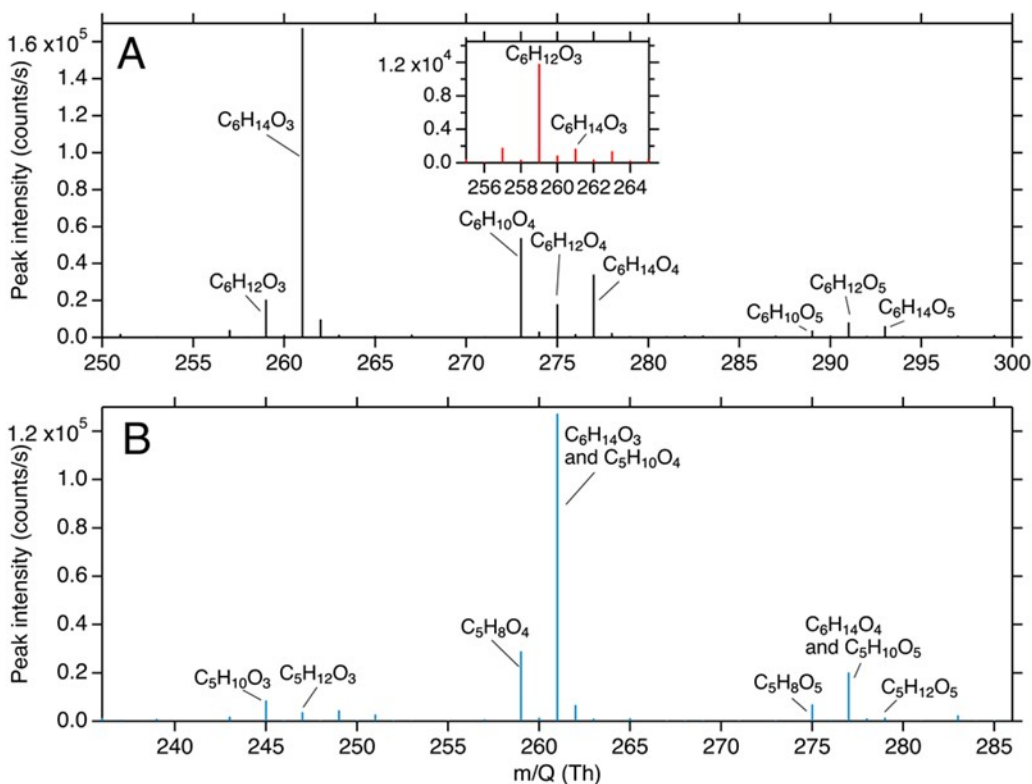

**Figure S1.** Example mass spectrum of gas-phase products of (A) hexanal + HO<sub>2</sub> and (B) pentanal + HO<sub>2</sub> in the presence of O<sub>3</sub>, TME (C<sub>6</sub>H<sub>12</sub>), and methanol (see experimental conditions described in the main text). In (A), the high abundance of C<sub>6</sub>H<sub>14</sub>O<sub>3</sub> is likely from both TME and hexanal, leading to ambiguity in confirming the hexanal + HO<sub>2</sub> reaction. But in the insert of (A), the mass spectrum is from ozonolysis of a-pinene (C<sub>10</sub>H<sub>16</sub>) + hexanal + methanol, and it shows a C<sub>6</sub>H<sub>14</sub>O<sub>3</sub> peak, indicative of the hexanal + HO<sub>2</sub> chemistry. Under similar conditions but without hexanal (i.e., control conditions of a-pinene + O<sub>3</sub> + methanol), the C<sub>6</sub>H<sub>14</sub>O<sub>3</sub> peak was not present.

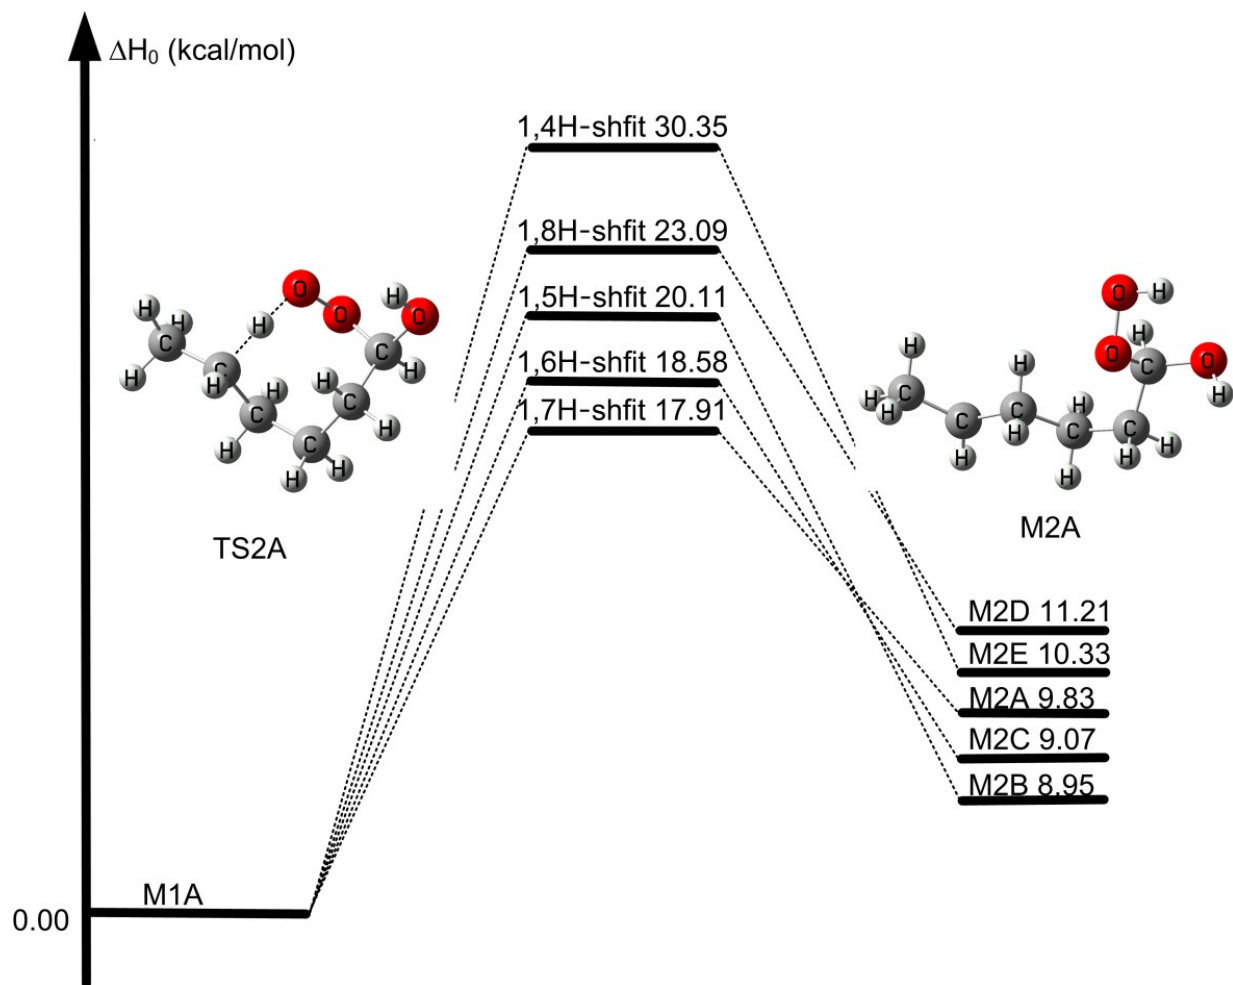

**Figure S2.** The relative enthalpies of all the H-shift reactions of the adduct M1A ( $C_6H_{13}O_5$ ) at the CCSD(T)-F2a/cc-pVDZ-F12//M06-2X/MG3S level with the standard scale factor at 0 K.

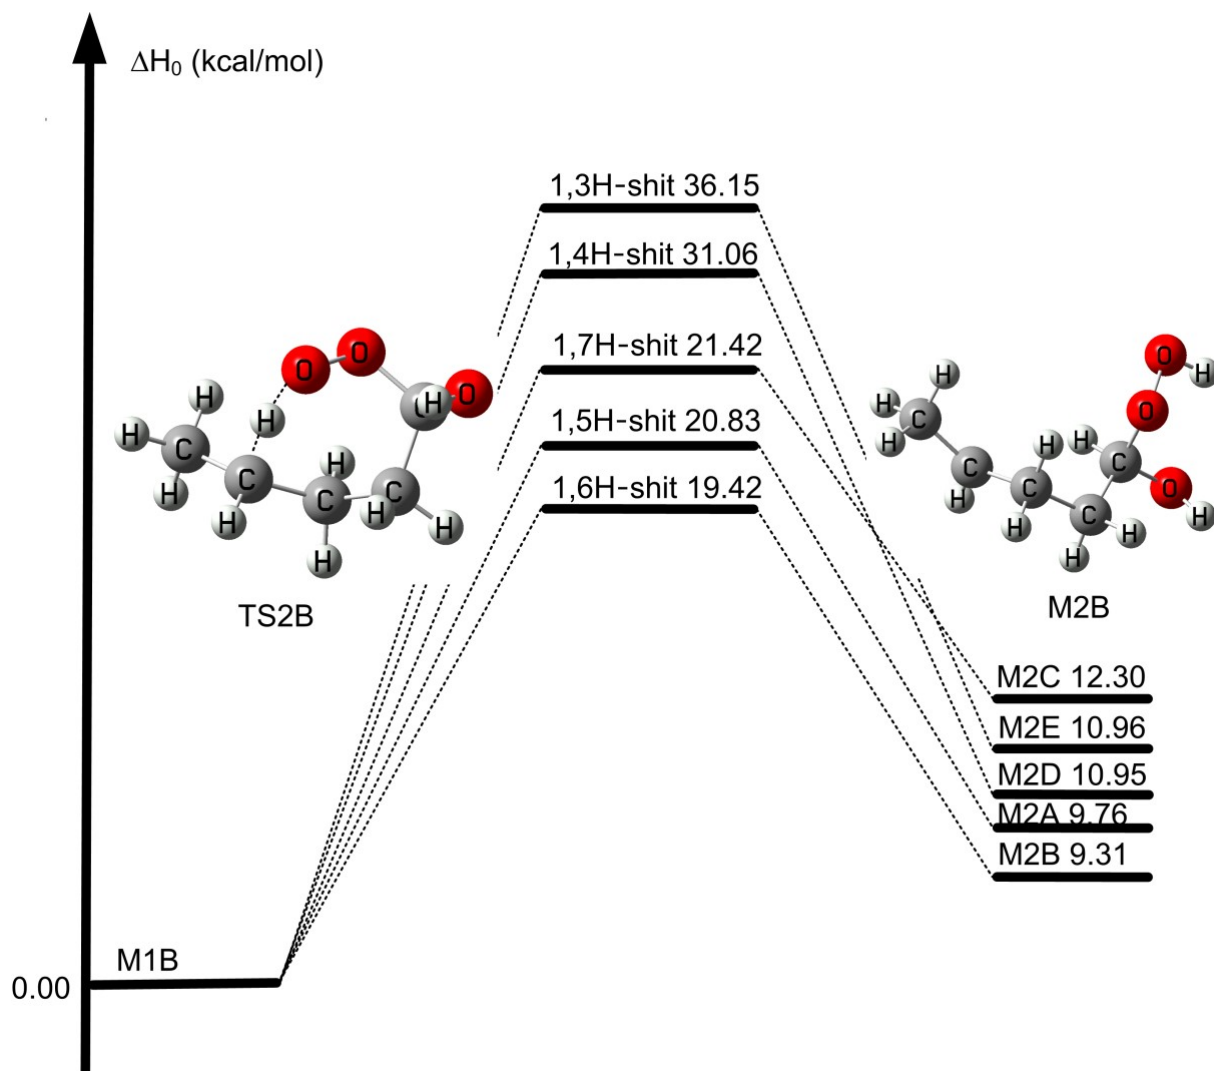

**Figure S3.** The relative enthalpies of all the H-shift reactions of the adduct M1B ( $C_5H_{11}O_5$ ) at the CCSD(T)-F2a/cc-pVDZ-F12//M06-2X/MG3S level with the standard scale factor at 0 K.

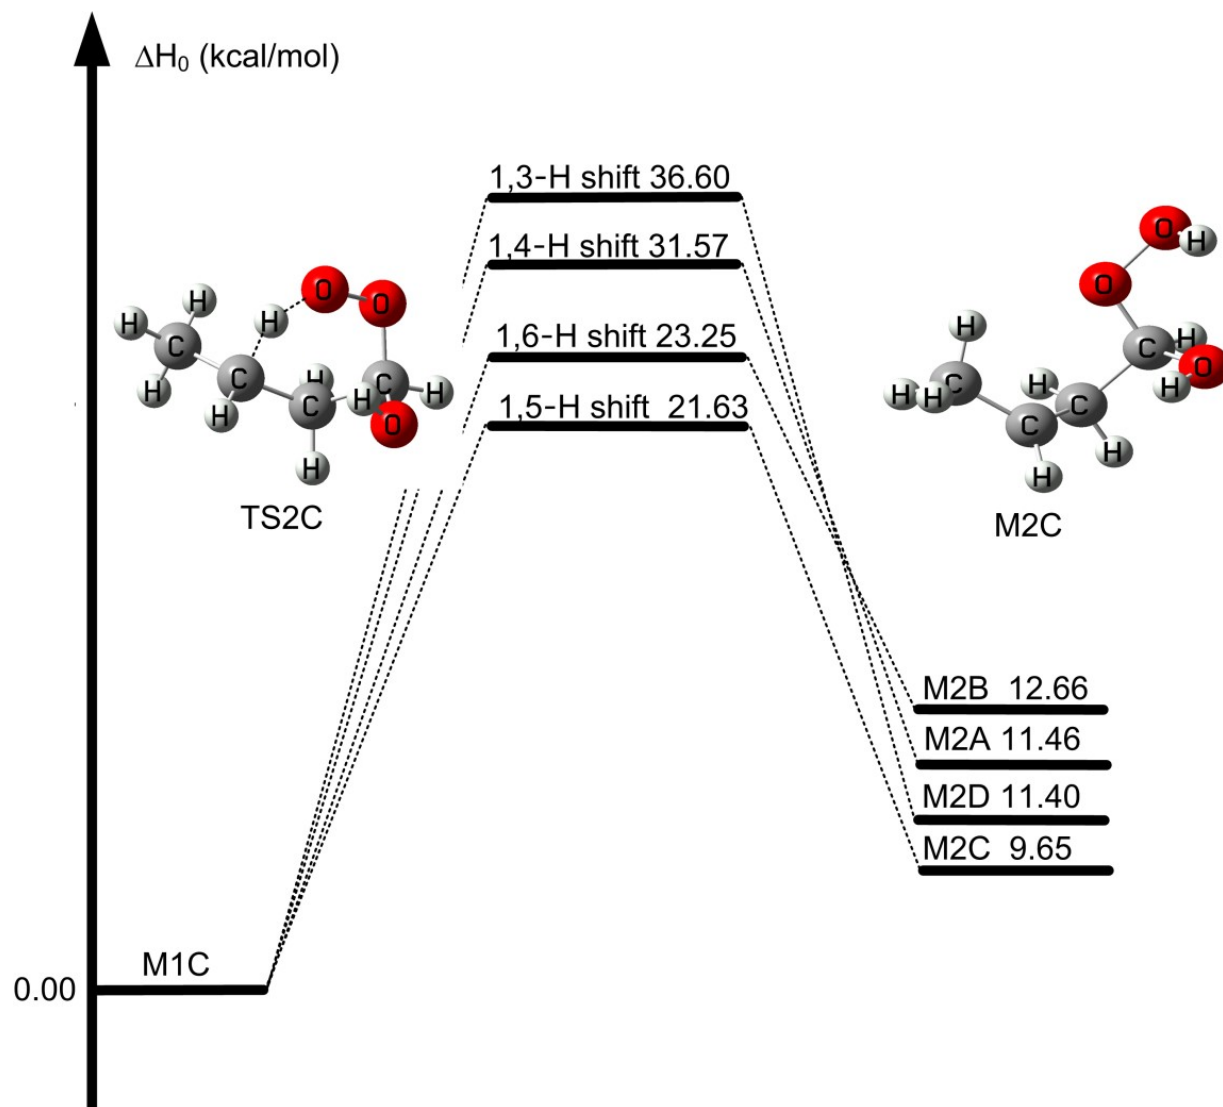

**Figure S4.** The relative enthalpies of all the H-shift reactions of the adduct M1C ( $C_4H_9O_5$ ) at the CCSD(T)-F2a/cc-pVDZ-F12//M06-2X/MG3S level with the standard scale factor at 0 K.

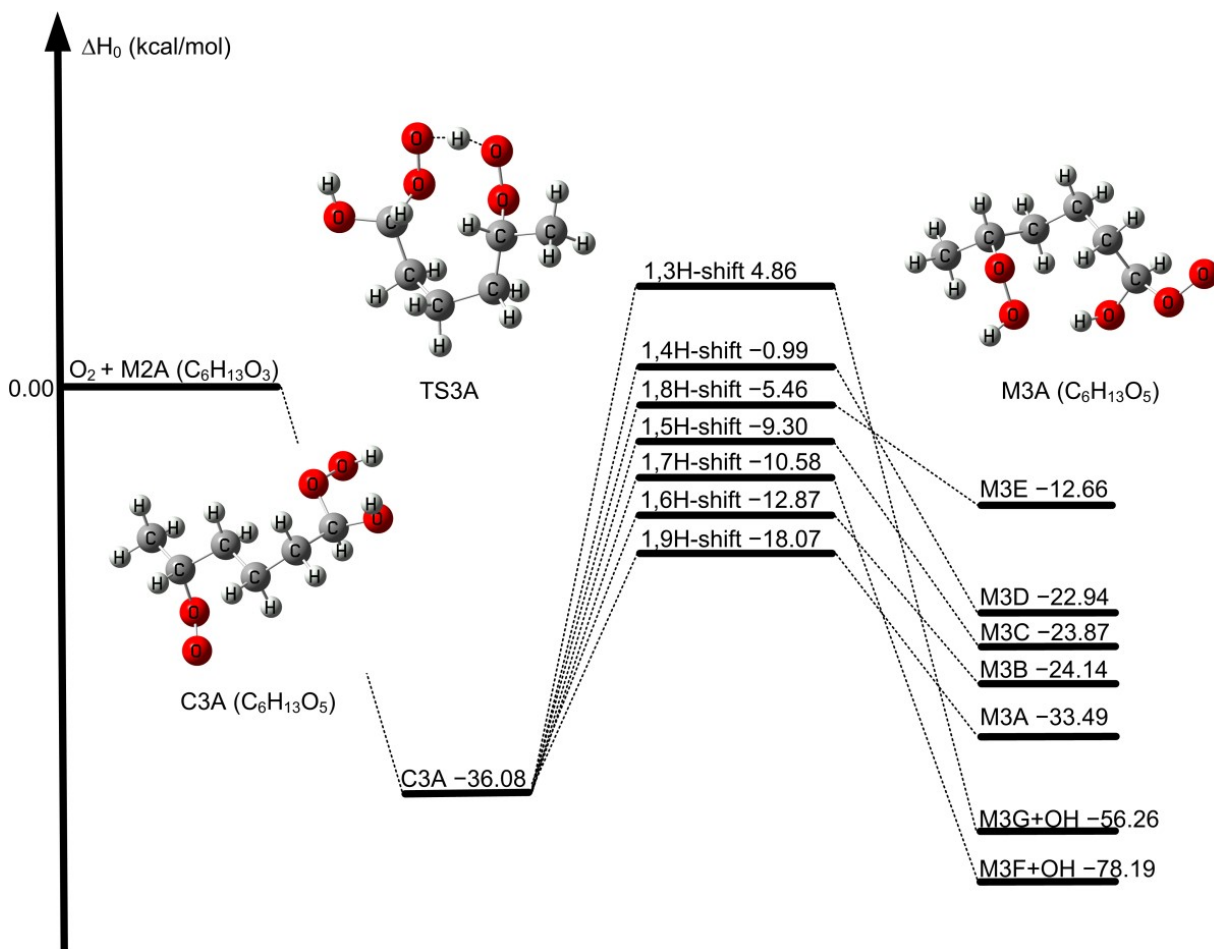

**Figure S5.** The relative enthalpies of all the H-shift reactions of the adduct  $C_3A$  ( $C_6H_{13}O_5$ ) at the CCSD(T)-F2a/cc-pVDZ-F12//M06-2X/MG3S level with the standard scale factor at 0 K.



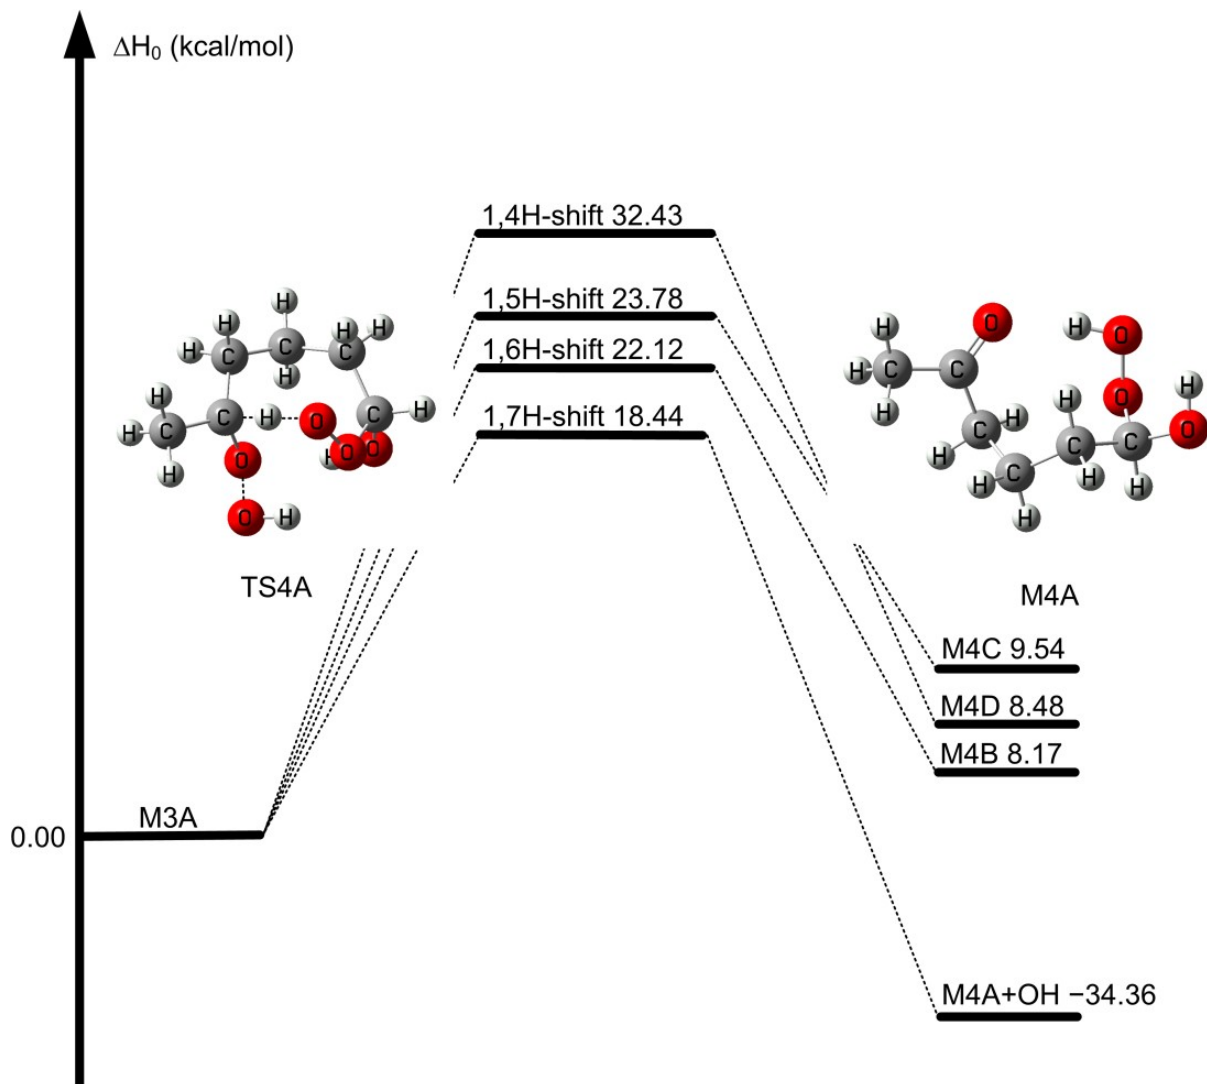

**Figure S6.** The relative enthalpies of all the H-shift reactions of the adduct M3A ( $C_6H_{13}O_5$ ) at the CCSD(T)-F2a/cc-pVDZ-F12//M06-2X/MG3S level with the standard scale factor at 0 K.

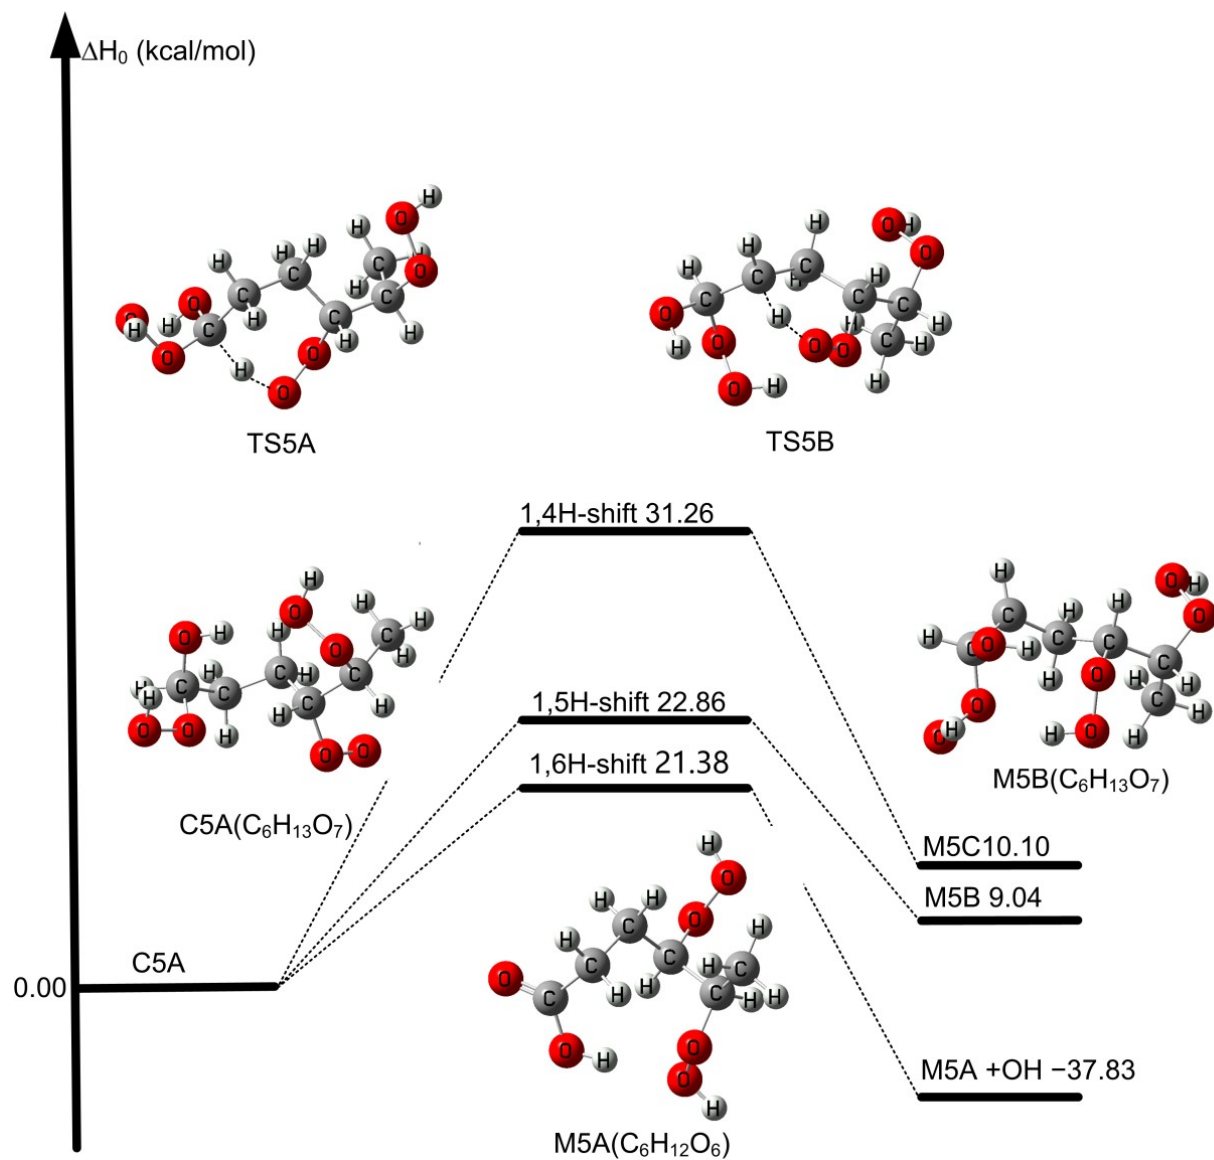

**Figure S7.** The relative enthalpies of all the H-shift reactions of the adduct C5A ( $C_6H_{13}O_7$ ) at the CCSD(T)-F2a/cc-pVDZ-F12//M06-2X/MG3S level with the standard scale factor at 0 K.

**Input file for MESS for the bimolecular reaction of HO<sub>2</sub> + C<sub>5</sub>H<sub>11</sub>CHO**

! Global Section

```

TemperatureList[K]          190. 200. 210. 220. 230. 240. 250. 260. 270. 280.
290. 298. 300. 310. 320. 330. 340. 350.
PressureList[bar]          0.0316 0.1 0.178 0.316 0.562 1. 1.01325 1.78 3.16
5.62 10. 31.6 50. 100. 1000.
EnergyStepOverTemperature  .2
ExcessEnergyOverTemperature 30
ModelEnergyLimit[kcal/mol] 400
CalculationMethod          direct
  WellCutoff                10
  ChemicalEigenvalueMax     .2
  ChemicalEigenvalueMin     1.e-10

```

! Model Section

Model

EnergyRelaxation

Exponential

Factor[1/cm] 300

Power 0

ExponentCutoff 30

End

CollisionFrequency

LennardJones

Epsilons[1/cm] 82. 227.11

Sigmas[angstrom] 3.74 4.45

Masses[amu] 28. 133.08 ! N2 HO2+C6H12O

End

!Species

Well W1 # C1A CCSD(t)

Species

RRHO

Geometry[angstrom] 22

|   |             |             |             |
|---|-------------|-------------|-------------|
| C | -2.90532500 | 0.60333500  | -0.03542000 |
| H | -3.49950200 | 0.25230500  | -0.88045100 |
| H | -2.37861100 | 1.50628100  | -0.34762000 |
| H | -3.58938200 | 0.87595600  | 0.76717100  |
| C | -1.91015300 | -0.46098200 | 0.41180300  |
| H | -1.33896200 | -0.07083100 | 1.25605100  |
| H | -2.44213100 | -1.34587300 | 0.77323300  |
| C | -0.96934300 | -0.86503900 | -0.71894000 |
| H | -0.47166700 | 0.02432200  | -1.10948700 |
| H | -1.56553600 | -1.26270800 | -1.54419100 |
| C | 0.07678400  | -1.91162900 | -0.33296700 |
| H | 0.65253800  | -2.18799300 | -1.21737000 |
| H | -0.42839500 | -2.81578600 | 0.01354800  |
| C | 1.04401200  | -1.45540200 | 0.75266500  |
| H | 0.53141600  | -1.12856000 | 1.66095000  |
| H | 1.69441800  | -2.27755400 | 1.07425300  |

```

C          1.96505500   -0.34734400    0.34717800
H          2.57610500    0.08549200    1.15789600
O          2.09665700    0.05758600   -0.78556000
H          1.30254400    1.67663100   -0.80979900
O          0.68293700    2.31818000   -0.38670600
O          0.36427800    1.78556900    0.75475300
Core      RigidRotor
SymmetryFactor          1
End
Frequencies[1/cm]      60
 43.01 61.62 79.60 92.29 129.17 163.82 207.50 219.02 252.02
259.43 274.76 291.17 344.18 461.87 559.30 661.69 707.81 743.96
818.87 853.72 904.03 952.97 967.62 1034.93 1060.53 1097.39
1145.38 1148.45 1227.54 1249.67 1300.64 1303.62 1325.69
1336.68 1382.89 1395.30 1408.17 1415.52 1430.00
1451.29 1486.57 1492.91 1499.55 1505.95 1513.09
1541.11 1815.62 2983.31 3041.07 3046.23 3057.16 3058.74
3066.18 3084.58 3093.14 3107.87 3115.61 3127.19 3135.09 3428.76
ZeroEnergy[kcal/mol]   -6.81
End
End
Well      W2      # M1A      CCSD(t)
Species
RRHO
Geometry[angstrom]    22
C          2.91698200    1.16206700    0.65472700
H          3.48990900    0.60544000    1.39862700
H          1.96249700    1.43290800    1.10762900
H          3.45162800    2.08690300    0.44325100
C          2.72504200    0.33445900   -0.61212100
H          2.10542200    0.88825000   -1.32130200
H          3.68944900    0.19398700   -1.10314300
C          2.11181200   -1.04179100   -0.34891400
H          2.81556900   -1.63725900    0.23787400
H          1.98305200   -1.56388900   -1.30073200
C          0.77138200   -1.01168300    0.38607100
H          0.90932800   -0.62246600    1.39799800
H          0.40301500   -2.03261700    0.50071100
C          -0.28071800  -0.17059900   -0.32983500
H          0.00343600    0.88198000   -0.34610500
H          -0.38855200  -0.49140200   -1.37280600
C          -1.63271600  -0.27062900    0.33955200
H          -1.60549200    0.04161600    1.38291300
O          -2.21346800  -1.51415600    0.28306000
H          -2.11168000  -1.87964800   -0.60102900
O          -2.56160100    0.64518500   -0.32868600
O          -2.27221700    1.87962700   -0.07446900
Core      RigidRotor
SymmetryFactor          1

```

```

End
Frequencies[1/cm]          60
42.39 54.62 104.85 125.72 148.39 199.04 249.46 290.37 298.12 351.42
370.97 469.07 504.13 518.58 571.79 730.97 790.81 853.51 871.40 956.65
965.51 993.20 1018.00 1039.99 1109.40 1122.94 1138.20 1189.36 1211.95
1259.87 1291.00 1300.49 1311.84 1327.79 1361.16 1372.01 1381.82 1391.89
1411.63 1419.46 1434.08 1484.04 1494.10 1499.52 1505.13 1510.76 1521.11
3032.98 3047.53 3055.86 3061.32 3062.44 3084.24 3093.51 3100.35 3118.72
3125.06 3128.53 3136.61 3864.91
ZeroEnergy[kcal/mol]      -10.34
End
End
Bimolecular                R   #
Fragment                   C6H12O
RRHO
Geometry[angstrom]        19
C          3.14059400      0.55855800      0.30642400
H          3.31813000      0.11219100      1.28595500
H          2.85697800      1.59984800      0.46411400
H          4.08179500      0.54701600     -0.24194100
C          2.04494000     -0.19191700     -0.44111800
H          1.89917500      0.25455700     -1.42780100
H          2.35632800     -1.22585500     -0.61322600
C          0.71718600     -0.18411800      0.30708000
H          0.39720500      0.84870300      0.46310300
H          0.85988900     -0.62483600      1.29950300
C          -0.37916000    -0.94721000     -0.42984200
H          -0.06869400    -1.98512200     -0.56673600
H          -0.51056700    -0.51820200     -1.42528800
C          -1.71397200    -0.91557700      0.29969400
H          -2.42360400    -1.63911000     -0.11653300
H          -1.60558400    -1.19379000      1.35349800
C          -2.40806200      0.41944800      0.25169400
H          -3.33970200      0.48971700      0.84638600
O          -2.02881200      1.36247300     -0.38557900
Core          RigidRotor
SymmetryFactor            1
End
Frequencies[1/cm]          51
71.88 75.59 134.33 149.79 205.19 240.29 271.70
390.97 400.25 667.38 708.07 738.73 809.10 878.12
907.30 947.92 973.03 1043.22 1068.01 1095.12 1146.15 1158.10
1234.60 1255.17 1302.76 1319.91 1338.27 1374.15 1387.80
1410.65 1416.35 1426.26 1452.00 1485.38 1491.78 1502.02
1506.00 1514.77 1861.52 2938.85 3033.44 3040.19 3047.34 3059.13
3060.66 3071.36 3075.92 3091.18 3110.49 3126.06 3134.00
ZeroEnergy[kcal/mol]      0
ElectronicLevels[1/cm]    1
0          2

```

```

End
Fragment          HO2
RRHO
  Geometry[angstrom]  3
  H                 -0.87923900  -0.86675500  0.00000000
  O                 0.05495200   -0.59862600  0.00000000
  O                 0.05495200    0.70697000  0.00000000
  Core      RigidRotor
    SymmetryFactor    1
  End
  Frequencies[1/cm]  3
  1264.87 1469.59 3703.12
  ZeroEnergy[kcal/mol]  0
  ElectronicLevels[1/cm]  1
  0      2
  End
  GroundEnergy[kcal/mol]  0
  End
!Barriers
Barrier  B1  R  W1          # C1A
RRHO
  Stoichiometry  C6H13O3
  Core      PhaseSpaceTheory
    FragmentGeometry[angstrom]  19
    C                 3.14059400   0.55855800   0.30642400
    H                 3.31813000   0.11219100   1.28595500
    H                 2.85697800   1.59984800   0.46411400
    H                 4.08179500   0.54701600  -0.24194100
    C                 2.04494000  -0.19191700  -0.44111800
    H                 1.89917500   0.25455700  -1.42780100
    H                 2.35632800  -1.22585500  -0.61322600
    C                 0.71718600  -0.18411800   0.30708000
    H                 0.39720500   0.84870300   0.46310300
    H                 0.85988900  -0.62483600   1.29950300
    C                 -0.37916000  -0.94721000  -0.42984200
    H                 -0.06869400  -1.98512200  -0.56673600
    H                 -0.51056700  -0.51820200  -1.42528800
    C                 -1.71397200  -0.91557700   0.29969400
    H                 -2.42360400  -1.63911000  -0.11653300
    H                 -1.60558400  -1.19379000   1.35349800
    C                 -2.40806200   0.41944800   0.25169400
    H                 -3.33970200   0.48971700   0.84638600
    O                 -2.02881200   1.36247300  -0.38557900
    FragmentGeometry[angstrom]  3
    H                 -0.87923900  -0.86675500  0.00000000
    O                 0.05495200  -0.59862600  0.00000000
    O                 0.05495200   0.70697000  0.00000000
  SymmetryFactor    1
  PotentialPrefactor[au]  20.

```

```

PotentialPowerExponent      6.
End
Frequencies[1/cm]          54
 71.88 75.59 134.33 149.79 205.19 240.29 271.70
 390.97 400.25 667.38 708.07 738.73 809.10 878.12
 907.30 947.92 973.03 1043.22 1068.01 1095.12 1146.15 1158.10
 1234.60 1255.17 1302.76 1319.91 1338.27 1374.15 1387.80
 1410.65 1416.35 1426.26 1452.00 1485.38 1491.78 1502.02
 1506.00 1514.77 1861.52 2938.85 3033.44 3040.19 3047.34 3059.13
 3060.66 3071.36 3075.92 3091.18 3110.49 3126.06 3134.00
 1264.87 1469.59 3703.12
ZeroEnergy[kcal/mol]      -6.81
ElectronicLevels[1/cm]    1
 0      2
End
Barrier B2 W1 W2          # TS1A
RRHO
Geometry[angstrom]        22
 C      -4.29348900    0.29699600   -0.06437100
 H      -4.60356800   -0.72064100    0.17704300
 H      -4.38725600    0.42372800   -1.14378800
 H      -4.99201500    0.98187600    0.41461300
 C      -2.86038800    0.54879200    0.38850500
 H      -2.57701700    1.57989900    0.16260400
 H      -2.79109900    0.44229600    1.47398300
 C      -1.86403600   -0.39822600   -0.27023100
 H      -1.93116700   -0.29281300   -1.35769000
 H      -2.14603800   -1.43177600   -0.04491600
 C      -0.42832000   -0.15528300    0.17908500
 H      -0.35409800   -0.26396900    1.26230500
 H      -0.14321500    0.87505000   -0.05026700
 C      0.55485100    -1.10773600   -0.48603700
 H      0.29669300    -2.14597200   -0.24747700
 H      0.51753100    -1.02506300   -1.57476900
 C      1.97653000    -0.91930300   -0.04279800
 H      2.72928200    -1.47934400   -0.61016900
 O      2.25859500    -0.55587200    1.13600700
 H      2.63067800    0.62387300    0.90065000
 O      2.76579300    1.42769500    0.07902000
 O      2.38066200    0.73335300   -0.91340600
Tunneling                  Eckart
 ImaginaryFrequency[1/cm]  689.33
 WellDepth[kcal/mol]       5.13
 WellDepth[kcal/mol]       8.64
End
Core RigidRotor
 SymmetryFactor            1
End
Frequencies[1/cm]         59

```

---

```
46.84 59.52 88.26 123.32 134.25 156.47 229.23 248.39
287.20 365.74 421.71 572.07 657.92 722.91 732.54
753.52 794.49 836.46 904.38 929.54 962.87 1045.95 1058.45
1067.37 1079.70 1090.84 1147.40 1189.59 1234.47 1267.84
1295.80 1331.27 1335.79 1344.85 1384.16 1395.10 1401.59
1414.46 1419.72 1463.97 1490.37 1495.20 1506.06 1506.81
1516.66 1668.87 1949.52 3031.12 3035.16 3048.72 3050.61
3058.48 3059.61 3063.49 3084.98 3089.81 3112.66 3125.65 3135.29
ZeroEnergy[kcal/mol]          -1.67 ! B2-W1-W2
ElectronicLevels[1/cm]       1
    0    2
End
End
```



**Input file for MESS for the bimolecular reaction of HO<sub>2</sub> + C<sub>4</sub>H<sub>9</sub>CHO**

```

! Global Section
TemperatureList[K]          190. 200. 210. 220. 230. 240. 250. 260. 270. 280.
290. 298. 300. 310. 320. 330. 340. 350.
PressureList[bar]          0.0316 0.1 0.178 0.316 0.562 1. 1.78 3.16 5.62 10.
31.6 50. 100. 1000.
EnergyStepOverTemperature  .2
ExcessEnergyOverTemperature 30
ModelEnergyLimit[kcal/mol] 400
CalculationMethod          direct
  WellCutoff                10
  ChemicalEigenvalueMax     .2
  ChemicalEigenvalueMin     1.e-11
! Model Section
Model
  EnergyRelaxation
    Exponential
      Factor[1/cm]          300
      Power                  0
      ExponentCutoff        15
    End
  CollisionFrequency
    LennardJones
      Epsilons[1/cm]        82.    222.66
      Sigmas[angstrom]      3.74   4.27
      Masses[amu]           28.    119.07 ! N2    HO2+C5H10O
    End
  End
!Species
Well      W1      # C1B      CCSD(t)
Species
RRHO
Geometry[angstrom]        19
C              -1.42951600    0.63649500    -0.76973500
H              -0.41444600    0.75241400    -1.15136700
H              -2.09601200    0.84355000    -1.60880800
C              -1.65259900   -0.81335000   -0.33535600
H              -1.51728600   -1.47322400   -1.19336700
H              -2.68599200   -0.93015700   -0.00175100
C              -0.72984000   -1.27697700    0.78429400
H              -0.75689700   -0.61219300    1.65192100
H              -1.03252500   -2.25823300    1.16831800
C              0.70621900   -1.42263100    0.38818800
H              1.40781200   -1.64693300    1.20973800
O              1.11538100   -1.34762300   -0.74836800
H              2.01188900    0.21016800   -0.81793700
O              2.19794700    1.09268700   -0.41628300
O              1.57127100    1.09054100    0.72147900
C              -1.68448800    1.65426000    0.33738600

```

```

H          -1.61430500    2.67100500   -0.04668800
H          -2.68144600    1.52514500    0.76344300
H          -0.95624400    1.56683200    1.14321400
Core      RigidRotor
SymmetryFactor          1
End
Frequencies[1/cm]      51
58.18 73.04 92.15 107.97 150.54 189.50 228.78 250.98
279.55 285.08 340.87 424.54 553.85 663.44 709.31 762.72
854.20 884.08 918.88 1003.01 1018.14 1087.50 1132.36
1151.06 1230.76 1265.70 1304.39 1320.65 1366.84
1387.94 1401.10 1418.85 1430.61 1449.22 1487.13
1497.23 1506.98 1516.64 1541.41 1814.76 2987.09
3042.83 3059.17 3064.27 3073.30 3085.66 3106.07
3114.87 3131.94 3139.96 3425.23
ZeroEnergy[kcal/mol]   -6.67
End
End
Well      W2      # M1B      CCSD(t)
Species
RRHO
Geometry[angstrom]    19
C          2.59581600   -0.43430800   -0.18256500
H          3.33713100   -1.07549900    0.29701400
H          2.59505500   -0.70441900   -1.24193500
C          1.22445200   -0.74518900    0.41484800
H          1.23828700   -0.52490200    1.48641900
H          1.01967300   -1.81320000    0.32044800
C          0.09353500    0.04400400   -0.23798000
H          0.19819300    1.11174100   -0.04739500
H          0.10529000   -0.09413800   -1.32570300
C          -1.26230800  -0.38255200    0.27810100
H          -1.35439900  -0.26338500    1.35699900
O          -1.62123600  -1.66998800   -0.03931600
H          -1.40642600  -1.84885400   -0.95988300
O          -2.28712000    0.48414400   -0.31028500
O          -2.22701400    1.68209000    0.17299100
C          3.01258900    1.02469600   -0.02619700
H          4.03213200    1.18045300   -0.37584600
H          2.36611500    1.69244500   -0.59516100
H          2.96740800    1.32988900    1.02067900
Core      RigidRotor
SymmetryFactor          1
End
Frequencies[1/cm]      51
45.71 79.76 112.69 133.96 170.85 257.69 274.35
313.25 348.16 434.76 499.83 506.44 570.27 751.55
802.18 891.25 933.37 974.06 985.95 1021.24 1098.54
1119.85 1129.15 1211.19 1216.44 1276.86 1302.82 1311.95

```

```

1322.58 1364.73 1372.65 1382.85 1407.64 1421.71 1433.73
1486.13 1495.60 1503.93 1509.48 1515.68 3032.14 3048.06
3053.72 3062.46 3092.47 3095.27 3121.41 3128.98
3132.57 3140.00 3864.95
ZeroEnergy[kcal/mol]          -11.42
End
End
Bimolecular                    R   #
Fragment                       C5H10O
RRHO
Geometry[angstrom]            16
C                               -1.21829900  -0.06267300   0.50915800
H                               -0.70093600  -0.97807500   0.80005300
H                               -1.34470200   0.53381600   1.41708400
C                               -0.34943700   0.71113300  -0.47842800
H                               -0.85629200   1.63762600  -0.75663200
H                               -0.23231700   0.12394200  -1.39163700
C                               1.02829300   1.03971900   0.07688300
H                               1.55342100   1.77490900  -0.54276800
H                               0.96523000   1.49536600   1.07095200
C                               1.94785300  -0.14781900   0.17960900
H                               2.92637200   0.05180700   0.65832200
O                               1.69163900  -1.24586700  -0.23009100
C                               -2.58297400  -0.40589200  -0.07493200
H                               -3.20003800  -0.94730500   0.64092800
H                               -3.12121600   0.49745700  -0.36619900
H                               -2.47525000  -1.02941000  -0.96311400
Core                            RigidRotor
SymmetryFactor                 1
End
Frequencies[1/cm]              42
81.40 116.18 156.07 245.08 261.46 278.42 415.34
666.43 706.73 758.01 859.00 895.50 909.32 1003.29
1039.18 1077.63 1144.67 1154.71 1243.94 1274.38
1331.28 1334.95 1385.09 1404.84 1415.48 1426.67
1452.11 1486.57 1498.55 1506.21 1512.59 1861.67
2940.00 3040.09 3048.17 3058.45 3061.00 3071.87
3092.92 3109.08 3128.71 3135.95
ZeroEnergy[kcal/mol]           0
ElectronicLevels[1/cm]         1
0           2
End
Fragment                       HO2
RRHO
Geometry[angstrom]            3
H                               -0.87923900  -0.86675500   0.00000000
O                               0.05495200  -0.59862600   0.00000000
O                               0.05495200   0.70697000   0.00000000
Core                            RigidRotor

```

```

SymmetryFactor          1
End
Frequencies[1/cm]      3
1264.87 1469.59 3703.12
ZeroEnergy[kcal/mol]   0
ElectronicLevels[1/cm] 1
  0      2
End
GroundEnergy[kcal/mol] 0
End
!Barriers
Barrier B1  R  W1          # C1B
RRHO
Stoichiometry  C5H11O3
Core          PhaseSpaceTheory
FragmentGeometry[angstrom] 16
  C          -1.21829900  -0.06267300  0.50915800
  H          -0.70093600  -0.97807500  0.80005300
  H          -1.34470200  0.53381600  1.41708400
  C          -0.34943700  0.71113300  -0.47842800
  H          -0.85629200  1.63762600  -0.75663200
  H          -0.23231700  0.12394200  -1.39163700
  C          1.02829300  1.03971900  0.07688300
  H          1.55342100  1.77490900  -0.54276800
  H          0.96523000  1.49536600  1.07095200
  C          1.94785300  -0.14781900  0.17960900
  H          2.92637200  0.05180700  0.65832200
  O          1.69163900  -1.24586700  -0.23009100
  C          -2.58297400  -0.40589200  -0.07493200
  H          -3.20003800  -0.94730500  0.64092800
  H          -3.12121600  0.49745700  -0.36619900
  H          -2.47525000  -1.02941000  -0.96311400
FragmentGeometry[angstrom] 3
  H          -0.87923900  -0.86675500  0.00000000
  O          0.05495200  -0.59862600  0.00000000
  O          0.05495200  0.70697000  0.00000000
SymmetryFactor          1
PotentialPrefactor[au]  20.
PotentialPowerExponent  6.
End
Frequencies[1/cm]      45
81.40 116.18 156.07 245.08 261.46 278.42 415.34
 666.43 706.73 758.01 859.00 895.50 909.32 1003.29
1039.18 1077.63 1144.67 1154.71 1243.94 1274.38
1331.28 1334.95 1385.09 1404.84 1415.48 1426.67
1452.11 1486.57 1498.55 1506.21 1512.59 1861.67
2940.00 3040.09 3048.17 3058.45 3061.00 3071.87
3092.92 3109.08 3128.71 3135.95
1264.87 1469.59 3703.12

```

```

ZeroEnergy[kcal/mol]          -6.67
ElectronicLevels[1/cm]       1
  0      2
End
Barrier B2  W1 W2          # TS1B
RRHO
Geometry[angstrom]          19
  C      -2.42565100  -0.26246600  -0.32608100
  H      -2.46248100  -0.18647700  -1.41588900
  H      -2.75651400  -1.27415100  -0.07674300
  C      -0.98842100  -0.07413500   0.14584100
  H      -0.94125900  -0.15406300   1.23319300
  H      -0.65156800   0.93521100  -0.10615300
  C      -0.03837900  -1.08994800  -0.47160100
  H      -0.34943900  -2.10773000  -0.20911400
  H      -0.05090200  -1.03742000  -1.56279100
  C       1.38182500  -0.95460000  -0.00482300
  H       2.11830800  -1.56492700  -0.54080200
  O       1.65789400  -0.57071300   1.16887100
  H       2.08978300   0.58310900   0.90825200
  O       2.27783800   1.35581400   0.06745700
  O       1.87938900   0.65181000  -0.91281700
  C      -3.37484400   0.75621300   0.29298600
  H      -4.39823100   0.61054200  -0.05013900
  H      -3.37064000   0.67795700   1.38079100
  H      -3.07521000   1.77227200   0.03337400
Tunneling                      Eckart
ImaginaryFrequency[1/cm]      698.22
WellDepth[kcal/mol]           4.99
WellDepth[kcal/mol]           9.74
End
Core                            RigidRotor
SymmetryFactor                 1
End
Frequencies[1/cm]              50
63.84 67.95 103.20 145.01 171.72 243.68 274.39 311.53
402.58 568.60 652.26 718.32 734.05 781.74 795.55
901.77 925.54 940.04 1050.61 1057.07 1066.17 1089.55
1144.70 1188.62 1245.66 1286.69 1316.69 1333.94
1375.40 1385.61 1395.62 1414.96 1419.33 1464.29
1493.92 1502.58 1505.83 1516.33 1667.84
1949.48 3035.62 3045.09 3049.97 3059.92
3062.36 3075.33 3088.35 3111.15 3128.68 3136.78
ZeroEnergy[kcal/mol]          -1.68 ! B2-W1-W2
ElectronicLevels[1/cm]       1
  0      2
End
End

```

**Input file for MESS for the bimolecular reaction of HO<sub>2</sub> + C<sub>3</sub>H<sub>7</sub>CHO**

```

! Global Section
TemperatureList[K]          190. 200. 210. 220. 230. 240. 250. 260. 270. 280.
290. 298. 300. 310. 320. 330. 340. 350.
PressureList[bar]          0.0316 0.1 0.178 0.316 0.562 1. 1.78 3.16 5.62 10.
31.6 50. 100. 1000.
EnergyStepOverTemperature  .2
ExcessEnergyOverTemperature 30
ModelEnergyLimit[kcal/mol] 400
CalculationMethod          direct
  WellCutoff                10
  ChemicalEigenvalueMax     .2
  ChemicalEigenvalueMin     1.e-11
! Model Section
Model
  EnergyRelaxation
    Exponential
      Factor[1/cm]          300
      Power                  0
      ExponentCutoff        15
    End
  CollisionFrequency
    LennardJones
      Epsilons[1/cm]        82.    206.93
      Sigmas[angstrom]      3.74   4.28
      Masses[amu]           28.    105.06 ! N2    HO2+C4H8O
    End
  End
!Species
Well      W1      # C1C      CCSD(t)
Species
RRHO
Geometry[angstrom]        16
C              -1.98464200    0.27028700    -0.14054800
H              -2.14086800    -0.14288900    -1.13790100
H              -2.97120500    0.45273900    0.28671800
C              -1.26986600    -0.76420900    0.71741100
H              -0.99007200    -0.35701600    1.69433300
H              -1.91065900    -1.62697700    0.93319600
C              -0.02160400    -1.32327800    0.10913600
H              0.56838400    -1.99168800    0.75900800
O              0.33940800    -1.11519000    -1.02700200
H              1.79724400    -0.07057900    -0.85848600
O              2.33306500    0.54010900    -0.29786000
O              1.78398400    0.49712400    0.87878500
C              -1.21525700    1.58378200    -0.23914100
H              -0.25828600    1.44265200    -0.73772500
H              -1.78080700    2.32360300    -0.80368300
H              -1.01717200    1.99432100    0.75200000

```

```

Core      RigidRotor
SymmetryFactor          1
End
Frequencies[1/cm]      42
49.40 86.31 93.40 124.74 188.33 219.42 257.57 275.16
292.20 372.86 556.43 662.35 713.53 798.23 862.95 954.40
977.16 1064.55 1125.00 1154.30 1257.15 1299.30 1303.85
1374.61 1396.64 1417.98 1429.17 1447.91 1490.58 1501.77
1512.60 1541.71 1815.84 2987.92 3041.02 3068.58 3071.11
3080.31 3111.91 3136.48 3157.43 3428.42
ZeroEnergy[kcal/mol]   -7.13
End
End
Well      W2      # MIC      CCSD(t)
Species
RRHO
Geometry[angstrom]     16
C              -1.75435300    0.20776600    0.38015700
H              -1.69735200    0.07826300    1.46351600
H              -1.84647100    1.28063900    0.20305600
C              -0.46460100   -0.30560600   -0.25057200
H              -0.34184000   -1.37185800   -0.05541400
H              -0.49078400   -0.17888700   -1.33881400
C              0.75630900    0.41106400    0.28007400
H              0.86520800    0.30811000    1.35903300
O              0.81598900    1.74853800   -0.02737200
H              0.57078200    1.88103000   -0.94817900
O              1.95399800   -0.19814100   -0.30391600
O              2.16306400   -1.38102000    0.17524700
C              -2.97898600   -0.51857900   -0.16301300
H              -2.91437300   -1.58949700    0.03162900
H              -3.89456700   -0.14834200    0.29532800
H              -3.06522300   -0.38234600   -1.24171400
Core      RigidRotor
SymmetryFactor          1
End
Frequencies[1/cm]      42
79.75 101.40 116.84 179.65 251.87 284.76 351.58
357.23 496.57 505.55 570.92 752.54 874.99 918.64
963.67 996.15 1072.50 1116.55 1128.36 1211.87 1243.02
1293.40 1312.27 1321.58 1361.77 1371.87 1406.24 1419.79
1434.37 1488.93 1500.18 1507.39 1516.24 3037.72 3059.94
3064.51 3092.51 3113.88 3127.31 3132.13 3141.57 3865.59
ZeroEnergy[kcal/mol]   -12.05
End
End
Bimolecular          R #
Fragment             C4H8O
RRHO

```

```

Geometry[angstrom]          13
  C      -1.01135400    0.40855500   -0.52911500
  H      -1.73263600    1.19241500   -0.76296000
  H      -0.69610300   -0.03078000   -1.47622100
  C       0.19963900    1.03687500    0.14582500
  H       0.54240500    1.93256700   -0.38394700
  H      -0.03479900    1.37509600    1.16093200
  C       1.39461800    0.12580300    0.23543700
  H       2.25630000    0.52971600    0.80192500
  O       1.46293000   -0.95991900   -0.27029800
  C      -1.67006400   -0.65936300    0.33839400
  H      -2.53510700   -1.09215500   -0.16190300
  H      -0.97058000   -1.46464000    0.55707800
  H      -2.00994900   -0.23408300    1.28423400
Core      RigidRotor
  SymmetryFactor            1
End
Frequencies[1/cm]          33
119.01 167.44 205.62 289.00 368.10 661.64
708.85 797.47 859.93 950.67 971.49 1062.02
1126.14 1154.07 1255.11 1298.82 1371.42 1390.14
1415.11 1426.12 1451.74 1490.63 1505.21 1515.37
1862.03 2939.23 3039.34 3062.94 3066.37 3078.37
3110.86 3133.12 3149.35
  ZeroEnergy[kcal/mol]      0
  ElectronicLevels[1/cm]    1
    0      2
End
Fragment      HO2
RRHO
  Geometry[angstrom]          3
  H      -0.87923900   -0.86675500    0.00000000
  O       0.05495200   -0.59862600    0.00000000
  O       0.05495200    0.70697000    0.00000000
Core      RigidRotor
  SymmetryFactor            1
End
Frequencies[1/cm]          3
1264.87 1469.59 3703.12
  ZeroEnergy[kcal/mol]      0
  ElectronicLevels[1/cm]    1
    0      2
End
GroundEnergy[kcal/mol]      0
End
!Barriers
Barrier B1  R  W1          # C1C
RRHO
  Stoichiometry  C4H9O3

```



```

Core      PhaseSpaceTheory
FragmentGeometry[angstrom] 13
C          -1.01135400    0.40855500   -0.52911500
H          -1.73263600    1.19241500   -0.76296000
H          -0.69610300   -0.03078000  -1.47622100
C          0.19963900    1.03687500    0.14582500
H          0.54240500    1.93256700   -0.38394700
H          -0.03479900    1.37509600    1.16093200
C          1.39461800    0.12580300    0.23543700
H          2.25630000    0.52971600    0.80192500
O          1.46293000   -0.95991900  -0.27029800
C          -1.67006400   -0.65936300    0.33839400
H          -2.53510700   -1.09215500  -0.16190300
H          -0.97058000   -1.46464000    0.55707800
H          -2.00994900   -0.23408300    1.28423400
FragmentGeometry[angstrom] 3
H          -0.87923900   -0.86675500    0.00000000
O          0.05495200   -0.59862600    0.00000000
O          0.05495200    0.70697000    0.00000000
SymmetryFactor 1
PotentialPrefactor[au] 20.
PotentialPowerExponent 6.
End
Frequencies[1/cm] 36
119.01 167.44 205.62 289.00 368.10 661.64
708.85 797.47 859.93 950.67 971.49 1062.02
1126.14 1154.07 1255.11 1298.82 1371.42 1390.14
1415.11 1426.12 1451.74 1490.63 1505.21 1515.37
1862.03 2939.23 3039.34 3062.94 3066.37 3078.37
3110.86 3133.12 3149.35 1264.87 1469.59 3703.12
ZeroEnergy[kcal/mol] -7.13
ElectronicLevels[1/cm] 1
0 2
End
Barrier B2 W1 W2 # TS1C
RRHO
Geometry[angstrom] 16
C          -1.41617400   -0.23489900  -0.41734100
H          -1.30440600    0.22988700  -1.39671600
H          -0.88899100   -1.19013600  -0.46359500
C          -0.75216300    0.64960300    0.62875000
H          -1.25248300    1.62399700    0.67268600
H          -0.83607900    0.21708600    1.62860700
C          0.69536100    0.93478400    0.35247600
H          1.24274100    1.43836600    1.15805800
O          1.13422700    1.03795800   -0.82987000
H          1.78251400   -0.03934300  -0.90003600
O          2.06684300   -1.01104200  -0.33942700
O          1.45342100   -0.77435900    0.74822300

```

|                                                          |                  |             |             |
|----------------------------------------------------------|------------------|-------------|-------------|
| C                                                        | -2.88932900      | -0.46914200 | -0.10649700 |
| H                                                        | -3.35569500      | -1.10301300 | -0.85898200 |
| H                                                        | -3.01342100      | -0.95365200 | 0.86279000  |
| H                                                        | -3.43626900      | 0.47427200  | -0.07854600 |
| Tunneling                                                |                  |             |             |
|                                                          | Eckart           |             |             |
| ImaginaryFrequency[1/cm]                                 | 699.59           |             |             |
| WellDepth[kcal/mol]                                      | 5.44             |             |             |
| WellDepth[kcal/mol]                                      | 10.36            |             |             |
| End                                                      |                  |             |             |
| Core RigidRotor                                          |                  |             |             |
| SymmetryFactor                                           | 1                |             |             |
| End                                                      |                  |             |             |
| Frequencies[1/cm]                                        | 41               |             |             |
| 73.92 85.26 134.58 221.38 247.50 280.21 347.35 571.65    |                  |             |             |
| 655.48 719.85 741.62 790.54 852.66 878.83 982.32 1040.00 |                  |             |             |
| 1065.76 1069.77 1141.45 1188.11 1262.99                  |                  |             |             |
| 1317.16 1333.27 1384.12 1395.69 1411.53                  |                  |             |             |
| 1418.94 1464.35 1499.38 1506.88 1514.37                  |                  |             |             |
| 1667.75 1950.06 3035.43 3050.19 3059.98 3072.75          |                  |             |             |
| 3087.73 3110.90 3132.24 3139.77                          |                  |             |             |
| ZeroEnergy[kcal/mol]                                     | -1.69 ! B2-W1-W2 |             |             |
| ElectronicLevels[1/cm]                                   | 1                |             |             |
| 0 2                                                      |                  |             |             |
| End                                                      |                  |             |             |
| End                                                      |                  |             |             |

## References of the ESI

- 1 Long, B.; Bao, J. L.; Truhlar, D. G., Reaction of SO<sub>2</sub> with OH in the atmosphere. *Phys. Chem. Chem. Phys.* **2017**, *19*, 8091-8100.
- 2 Holbrook, K. A.; Pilling, M. J.; Robertson, S. H., *Unimolecular Reactions, 2nd Edition*. John Wiley & Sons: Chichester: 1996.
- 3 Georgievskii, Y.; Miller, J. A.; Burke, M. P.; Klippenstein, S. J., Reformulation and Solution of the Master Equation for Multiple-Well Chemical Reactions. *J. Phys. Chem. A* **2013**, *117*, 12146-12154.
- 4 Bao, J. L.; Truhlar, D. G., Effect of energy dependence of the density of states on pressure-dependent rate constants. *Phys. Chem. Chem. Phys.* **2018**, *20*, 30475-30479.
- 5 Forst, W., The Theory of Unimolecular Reactions. *Academic Press: New York* **1973**, p 190f.
- 6 Gilbert, R., G; Luther, K.; Troe, J., Theory of thermal unimolecular reactions in the fall-off range. II. Weak collision rate constants. *Phys. Chem.* **1983**, *87*, 169-177.
- 7 Klippenstein, S. J., RRKM Theory and Its Implementation. In *Comprehensive Chemical Kinetics*. **2003**, *39*, 55-103.
- 8 Raghavachari, K.; Trucks, G. W.; Pople, J. A.; Head-Gordon, M., A fifth-order perturbation comparison of electron correlation theories. *Chem. Phys. Lett.* **1989**, *157*, 479-483.
- 9 Knizia, G.; Adler, T. B.; Werner, H.-J., Simplified CCSD(T)-F12 methods: Theory and benchmarks. *J. Chem. Phys.* **2009**, *130*, 054104.
- 10 Martin, J. M.; Kesharwani, M. K., Assessment of CCSD (T)-F12 approximations and basis sets for harmonic vibrational frequencies. *J. Chem. Theory. Comput.* **2014**, *10*, 2085-2090.
- 11 Zhao, Y.; Truhlar, D. G., The M06 suite of density functionals for main group thermochemistry, thermochemical kinetics, noncovalent interactions, excited states, and transition elements: two new functionals and systematic testing of four M06-class functionals and 12 other functionals. *Theor. Chem. Acc.* **2008**, *120*, 215-241.
- 12 Peverati, R.; Truhlar, D. G., M11-L: A Local Density Functional That Provides Improved Accuracy for Electronic Structure Calculations in Chemistry and Physics. *J. Phys. Chem. Lett.* **2012**, *3*, 117-124.
- 13 Yu, H. S.; He, X.; Truhlar, D. G., MN15-L: A new local exchange-correlation functional for Kohn–Sham density functional theory with broad accuracy for atoms, molecules, and solids. *J. Chem. Theory Comput.* **2016**, *12*, 1280-1293.
- 14 Czakó, G. b.; Szabó, I. n.; Telekes, H., On the choice of the ab initio level of theory for potential energy surface developments. *J. Phys. Chem. A* **2014**, *118*, 646-654.
- 15 Peterson, K. A.; Adler, T. B.; Werner, H.-J., Systematically convergent basis sets for explicitly correlated wavefunctions: The atoms H, He, B–Ne, and Al–Ar. *J. Chem. Phys.* **2008**, *128*, 1007.
- 16 Lynch, B. J.; Zhao, Y.; Truhlar, D. G., Effectiveness of Diffuse Basis Functions for Calculating Relative Energies by Density Functional Theory. *J. Phys. Chem. A* **2003**, *107*, 1384-1388.
- 17 Kuwata, K. T.; Hermes, M. R.; Carlson, M. J.; Zogg, C. K., Computational studies of the isomerization and hydration reactions of acetaldehyde oxide and methyl vinyl carbonyl oxide. *J. Phys. Chem. A* **2010**, *114*, 9192-9204.
- 18 Troe, J., Theory of thermal unimolecular reactions at low pressures. II. Strong collision rate constants. Applications. *J. Chem. Phys.* **1977**, *66*, 4758-4775.
- 19 Ben Akacha, N.; Guizani, O. E.; Gargouri, M., Improvement and modelling of hexenal transfer in liquid-gas reactor. *Applied Biochemistry and Biotechnology* **2007**, *143*, 276-283.
- 20 Brasseur, G. P.; Solomon, S., *Aeronomy of the middle atmosphere: Chemistry and physics of the stratosphere and mesosphere*. Springer Science & Business Media: 2006; Vol. 32.
- 21 Cabañas, B.; Martín, P.; Salgado, S.; Ballesteros, B.; Martínez, E., An Experimental Study on the Temperature Dependence for the Gas-Phase Reactions of NO<sub>3</sub> Radical with a Series of Aliphatic

Aldehydes. *J. Atmos. Chem.* **2001**, *40*, 23-39.
